1           **End-to-End Protocol for the Detection of SARS-CoV-2 from Built Environments**

2  
3       Ceth W. Parker<sup>1\*</sup>, Nitin Singh<sup>1\*</sup>, Scott Tighe<sup>2\*</sup>, Adriana Blachowicz<sup>1</sup>, Jason M. Wood<sup>1</sup>, Arman  
4       Seuylemezian<sup>1</sup>, Parag Vaishampayan<sup>1</sup>, Camilla Urbaniak<sup>1,3</sup>, Ryan Hendrickson<sup>1</sup>, Pheobe  
5       Laaguiby<sup>2</sup>, Kevin Clark<sup>1</sup>, Brian G. Clement<sup>1</sup>, Niamh B. O'Hara<sup>4,5</sup>, Mara Couto-Rodriguez<sup>4</sup>,  
6       Daniela Bezdán<sup>6,7</sup>, Chris Mason<sup>6</sup>, and Kasthuri Venkateswaran<sup>1\*</sup>

7  
8       <sup>1</sup>*NASA Jet Propulsion Laboratory, California Institute of Technology, Pasadena, CA, USA*

9       <sup>2</sup>*Vermont Integrative Genomics Resource, Larner College of Medicine, The University of  
10       Vermont, Burlington, VT, USA*

11       <sup>3</sup>*ZIN Technologies Inc., Middleburg Hts, OH, USA*

12       <sup>4</sup>*Biotia, New York, NY, USA*

13       <sup>5</sup>*SUNY Downstate Health Sciences University, Brooklyn, NY, USA*

14       <sup>6</sup>*Weill Medical College of Cornell University, New York, NY, USA*

15       <sup>7</sup>*Institute of Medical Virology and Epidemiology of Viral Diseases, University Hospital,  
16       Tubingen, Germany*

17  
18       \* Contributed equally

19  
20       Key Words: COVID-19, SARS-CoV-2, Surface Sampling, Built Environments, End-to-End,  
21       Fomites, Coronavirus

22  
23       BGC: <https://orcid.org/0000-0003-4591-014X>

24       JMW: <https://orcid.org/0000-0002-0847-4695>

## 26 **Abstract**

27 Severe acute respiratory syndrome coronavirus 2 (SARS-CoV-2), the virus that causes  
28 coronavirus disease 2019, is a respiratory virus primarily transmitted from person to person  
29 through inhalation of droplets or aerosols, laden with viral particles. However, as some studies  
30 have shown, virions can remain infectious for up to 72 hours on surfaces, which can lead to  
31 transmission through contact. For this reason, a comprehensive study was conducted to  
32 determine the efficiency of protocols to recover SARS-CoV-2 from surfaces in built  
33 environments. This end-to-end (E2E) study showed that the effective combination of monitoring  
34 SARS-CoV-2 on surfaces include using an Isohelix swab as a collection tool, DNA/RNA Shield  
35 as a preservative, an automated system for RNA extraction, and reverse transcriptase quantitative  
36 polymerase chain reaction (RT-qPCR) as the detection assay. Using this E2E approach, this  
37 study showed that, in some cases, SARS-CoV-2 viral standards were still recovered from  
38 surfaces as detected by RT-qPCR for as long as eight days even after bleach treatment.  
39 Additionally, debris associated with specific built environment surfaces appeared to negatively  
40 impact the recovery of RNA, with Amerstat inhibition as high as 90% when challenged with an  
41 inactivated viral control. Overall, it was determined that this E2E protocol required a minimum  
42 of 1,000 viral particles per 25 cm<sup>2</sup> to successfully detect virus from test surfaces. When this  
43 method was employed to evaluate 368 samples collected from various built environmental  
44 surfaces, all samples tested negative, indicating that the surfaces were either void of virus or  
45 below the detection limit of the assay.

## 46 **Importance**

47 The ongoing severe acute respiratory syndrome coronavirus 2 (SARS-CoV-2) (the virus  
48 responsible for coronavirus disease 2019; COVID-19) pandemic has led to a global slow down

49 with far reaching financial and social impacts. The SARS-CoV-2 respiratory virus is primarily  
50 transmitted from person to person through inhalation of infected droplets or aerosols. However,  
51 some studies have shown virions can remain infectious on surfaces for days, and can lead to  
52 human infection from contact with infected surfaces. Thus, a comprehensive study was  
53 conducted to determine the efficiency of protocols to recover SARS-CoV-2 from surfaces in  
54 built environments. This end-to-end study showed that the effective combination of monitoring  
55 SARS-CoV-2 on surfaces required a minimum of 1,000 viral particles per 25 cm<sup>2</sup> to successfully  
56 detect virus from surfaces. This comprehensive study can provide valuable information regarding  
57 surface monitoring of various materials as well as the capacity to retain viral RNA and allow for  
58 effective disinfection.

59

## 60 **Introduction**

61 The ongoing coronavirus disease 2019 (COVID-19) pandemic is caused by severe acute  
62 respiratory syndrome coronavirus 2 (SARS-CoV-2) (1), which was first identified in Wuhan,  
63 China, in December 2019. The World Health Organization (WHO) declared it a Public Health  
64 Emergency of international concern on January 30, 2020, and then a pandemic on March 11,  
65 2020. The high infection rate and rapid spread has caused global, social, and economic  
66 disruption (2), including postponement of many sporting, religious, political, and cultural events,  
67 as well as the closure of non-essential business, schools and universities worldwide across 160  
68 countries (3).

69 A primary goal set forth by the government has been to keep essential businesses (grocery stores,  
70 hospitals, gas stations, etc.) open while protecting staff and patrons with as little disruption as  
71 possible given the severity of the situation. Since the current model suggests that the main route  
72 of infection is person to person through inhalation of aerosolized droplets containing the virus (4),  
73 the use of masks, maintaining physical distancing, avoiding touching ones face, and washing  
74 hands have all been identified as important factors in preventing transmission (5). However,  
75 since SARS-CoV-2 can remain infective for hours to days on surfaces (6), it is possible to  
76 transmit and contract the virus by coming in contact with contaminated surfaces (7). When  
77 infected individuals inadvertently carry SARS-CoV-2 into built environments, the infection may  
78 spread between individuals via fomites. compromising the ability of workers to continue normal  
79 operations and activities. Therefore, disinfection and cleaning regiments have been established  
80 by most organizations as a precautionary measure to safeguard against viral transmission (8).

81 Since SARS-CoV-2 is fatal and a worldwide concern, the Centers for Disease Control and  
82 Prevention (CDC) and National Institutes of Health (NIH) have issued directives that molecular

83 (RNA)-based detection be applied to clinical specimens (4, 5) but no such policies have been set  
84 for environmental monitoring (6). Since the risk of infection from contaminated surfaces is of  
85 serious concern, the need for environmental surface monitoring, along with understanding the  
86 effectiveness of cleaning and disinfection is critical. In this study we outline a comprehensive  
87 approach to characterize and develop an effective environmental monitoring plan that can be  
88 used to understand viral persistence and elimination.

89 The ability to collect and analyze samples is fundamental to any microbial monitoring analysis.  
90 During this study, a noninfectious and replication-deficient virus was used as a surrogate for the  
91 SARS-Cov-2 virus to inoculate representative test surfaces and analyzed for recovery efficiency.  
92 Several sampling strategies were evaluated for collecting samples from various materials.  
93 Experimental parameters such as the method of viral inoculation of each surface type, collection  
94 and transport, and analysis techniques were used to determine viral recovery efficiency, total  
95 biomass, species-specific recovery, background contaminant levels, inhibitory factors, as well as  
96 sampling and detection anomalies.

97 The overall objective of the study was to develop a standardized end-to-end (E2E) protocol for  
98 the detection of SARS-CoV-2 from built environmental surfaces and to determine the minimum  
99 number of RNA copies needed on fomites to positively detect virus within the limit of detection  
100 of our assay. This study included collecting ~400 samples from seven surface types common to  
101 materials found in the built environment and measuring the recovery efficiency of the surrogate  
102 SARS-CoV-2 virus. After establishing the E2E protocol, further reproducibility studies were  
103 conducted by a second laboratory for verification.

## 104 **Results**

105 *Efficiency and Influence of Swab and DNA/RNA/Shield (DRS) Solution on Viral Extraction*

106 To determine the impact of the swabs and DRS transfer medium on the percent recovery  
107 of viral particles, the SeraCare AccuPlex SARS-CoV-2 reference material was added to tubes  
108 containing water and DRS solution, either directly into the tubes or inoculated onto swabs first,  
109 before RNA extraction followed by RT-qPCR. The resulting viral copy numbers were then  
110 compared and computed to understand the effects of swabs, DRS solution, and various other  
111 combinations in the recovery of viral particles (*Figure 1*). The RNA copies detected from  
112 Accuplex placed into the water suspension (no swab) was used as the 100% positive copy  
113 number reference to calculate other combinations. For practical applications, swabs should either  
114 be placed in water or in a transport medium like DRS so that samples could be transported and  
115 processed in the laboratory. Relative to Accuplex in water (no swab), there was a 12 % loss of  
116 viral load when Accuplex solution soaked on the swab before being placed in water (swab effect).  
117 Similarly, when Accuplex was placed directly into DRS instead of water (no swab), the recovery  
118 was 71% (DRS effect). The double effect of the swab and DRS on viral recovery was  
119 significantly less ( $p=0.0008$ ), with only 21% recovery (*Figure 1*).

#### 120 *RNA Extraction Efficiency*

121 An automated RNA extraction system was compared to a manual extraction where AccuPlex  
122 was inoculated on swabs containing DRS (*Figure 2*). There were no significant differences  
123 between the automated system and the manual extraction method. Subsequently, several viral  
124 transport media were also compared with water. No significant differences were observed  
125 between the three different viral transport media (*Figure 2*). All tested combinations yielded  
126 between 183 and 204 Nucleocapsid N1 fragment copies per 5 $\mu$ L RNA extract. To characterize  
127 the extraction efficiency of the automated process, the Accuplex viral particles were directly  
128 added to 96-well PCR plates, and subjected to thermal/enzymatic treatments before performing

129 RT-qPCR. This direct PCR method was considered as 100% (average 327 copies) and compared  
130 with other methods employed during this study. The comparative extraction efficiencies of the  
131 automated system with H<sub>2</sub>O, EtOH, and DRS were 61.0%, 61.5%, and 55.9%, respectively,  
132 while the manual method with DRS was 62.2%. All the extraction procedures exhibited high  
133 variabilities; however, the automated system demonstrated a lower coefficient of variation (4.0-  
134 7.7%) compared to manual kit extraction (8.4%).

### 135 *E2E Assay*

136 Zeptomatrix NATtrol, an inactivated SARS-CoV-2 positive control, was used in these  
137 studies since the AccuPlex stock contains high concentrations of glycerol, making it challenging  
138 to dry onto material surfaces. For this study, 5,000 copies of NATtrol viral particles per 25 cm<sup>2</sup>  
139 were spotted on bare stainless steel (BSS), painted stainless steel (PSS), polyethylene  
140 terephthalate modified with glycol (PETG), and fiberglass-reinforced plastic (FRP) materials.  
141 After desiccation of the viral control on the surface, the viral droplets left a visible plaque on all  
142 surfaces (smaller dots within the swabbed area), *Figure 3A*). Sample collection with the swab  
143 showed noticeable differences in the amount of the plaque that was dissociated during swabbing.  
144 The visible marks associated with BSS, PSS, and FRP materials remained mostly intact after  
145 swabbing; however, roughly half of the PETG plaques broke apart during swabbing (*Figure 3A*).  
146 Such plaque breakup possibly allowed for collecting larger pieces of the viral plaques on the  
147 PETG. Materials of 25 cm<sup>2</sup> (coupons) were swabbed 18 hours after inoculation (Day 1) and re-  
148 swabbed (with a fresh swab) after incubating at room temperature for additional 24 hours (Day  
149 2). On Day 8, after inoculation, the coupons were wiped down with 0.6% bleach (sodium  
150 hypochlorite) and then re-swabbed with a fresh swab for the third time.

151 Initially, when viral particles were desiccated in an Eppendorf tube and RNA extracted  
152 directly, a 11% loss of RNA due to desiccation was documented when compared to the solution  
153 that was not dried. The average percent recovery of the viral particles directly inoculated onto the  
154 swabs in DRS was ~23% (*Figure 3B*). However, when desiccated on materials, the highest  
155 percent of RNA recovery after Day 1 was observed for PETG material (1.68%), followed by PSS  
156 (0.57%) and BSS (0.21%) (*Figure 3C*). The lowest observed recovery was from FRP at 0.03%.  
157 (*Figure 3C*). On Day 2, viral recovery decreased on PETG (0.6%) and PSS coupons (0.16%);  
158 however, no decrease was noted on Day 2 for the BSS and FRP materials (*Figure 3C*). After  
159 treatment with 0.6% bleach, the recovery from BSS and PETG materials decreased to below  
160 detection limit (BDL), while the bleach was not effective in the removal of RNA from PSS as  
161 traces of RNA could still be detected (0.45% recovery), while only 0.03% recovery was  
162 observed on FRP. This might be because the RT-qPCR assay could detect very short fragments  
163 of RNA (~70 bp) and hence likely amplified degraded nucleic acids. This test revealed that viral  
164 persistence on surfaces varies, and in some cases (such as on PSS) viral RNA can be recovered  
165 after cleaning with bleach.

#### 166 *Comparison of RT-LAMP and RT-qPCR Assays*

167 Reverse-transcription loop-mediated isothermal amplification (RT-LAMP) is a single step  
168 colorimetric presence-absence assay that can be used as a narrow range semi-quantitative assay  
169 to determine the presence of SARS-CoV-2. When used as described by the manufacturer, the  
170 colorimetric RT-LAMP assay generates a yellow color for a positive result or remains  
171 unchanged (pink) for a negative result. Samples with borderline results have a gradient color  
172 change between yellow and pink. All samples can be further analyzed to obtain narrow range  
173 semi-quantitative results by measuring the resulting DNA product with the Qubit DNA broad



174 range quantification kit. Since the dynamic range between positive and negative is narrow,  
175 negative reactions (pink) have final DNA concentrations of <50 ng/μl post amplification, and  
176 full-color positives have a post amplification of ~550 ng/μl in a 25ul reaction. Samples that are  
177 borderline will have DNA yields between 50 and 550. For these studies, both positive viral  
178 controls were lysed directly (*Supplemental Table 1*), and the lowest limit of detection was  
179 determined at 5 and 12.5 copies per reaction for AccuPlex, and NATrol, respectively (*Figure 4A*).  
180 Since the RT-LAMP assay is not truly quantitative, values < 150 ng μL<sup>-1</sup> DNA concentration  
181 were considered negative, and values ≥ 150 ng μL<sup>-1</sup> were considered positive.

182 The samples collected from the inoculated coupon (*Figure 3A*) and analyzed by RT-qPCR  
183 were further analyzed using the RT-LAMP assay (*Figure 4B*). When the RT-qPCR results were  
184 compared with the RT-LAMP assay results, >300 copies were definitively positive with RT-  
185 LAMP assay (yellow coloration). However, for samples with concentrations near the limit of  
186 detection (LOD) for RT-LAMP assay (~12.5 copies/μL), the results between RT-qPCR and RT-  
187 LAMP were less correlative. (*Figure 4B*). For samples that exhibited discrepancies between the  
188 two assays (BSS2 and PETG3), Sanger sequencing was performed and confirmed SARS-CoV-2  
189 sequences (*Figure 4C*) indicating the reliability of the RT-LAMP assay.

#### 190 *Materials-Associated Organics Inhibition in the RNA Recovery*

191 Since many of the chemicals associated with cleaning, disinfection, and indigenous chemical  
192 constituents of the materials could have PCR inhibitors, we conducted several experiments to  
193 determine this potential. The precision cleaned uninoculated surface materials (25 cm<sup>2</sup>) described  
194 above (BSS, PSS, PETG, and FRP), were swabbed and placed in DRS media along with 5000  
195 copies of the NATrol viral control. These samples were processed along with a positive control  
196 that included a swab in DRS media with NATrol viral control but not exposed to any test

197 surfaces. Results indicated that all swabs used for sample collection of surface materials  
198 demonstrated similar recovery rate as the controls not used in surface sampling. Analysis of  
199 variance (ANOVA) indicated that swabs used to sample both BSS and FRP had similar recovery  
200 rates of 25.2% and 24.3%, respectively, while PSS had 30.8% and PETG had 36.0%  
201 (*Supplemental Figure 1*). Swabs sampling from PETG had a significantly higher recovery rate  
202 than FRP ( $p=0.0001$ ) and BSS ( $p=0.0006$ ), while PSS was significantly higher than FRP  
203 ( $p=0.0152$ ) and BSS ( $p=0.0439$ ) surface types. The recovery percentages exhibited for all swabs  
204 were within a standard deviation (Average 29.5%  $\pm$  5.5% standard deviation). These recovery  
205 rates from various tested materials (24% to 36%) were similar to the positive control that were  
206 not exposed to any test surfaces (20% to 25%; *Figure 3B*), which demonstrated that the precision  
207 cleaning did not leave residual organics or debris that could inhibit the RT-qPCR assay. The  
208 difference in the recovery was attributed solely to the DRS-swab combination, since viral  
209 particles spiked in water with swab without DRS solution demonstrated an ~88% recovery.

#### 210 *Influence of Environmental Debris on Viral Quantification*

211 To determine whether the detection of SARS-CoV-2 virus would be affected by the debris  
212 associated with built environment materials (stainless-steel metal, Amerstat, plastic, copper,  
213 painted surfaces, and wood), samples were collected and efficiency of the E2E procedure was  
214 tested. The collected materials in DRS solution were inoculated with and without AccuPlex (500  
215 copies) viral standards prior to RNA extraction and RT-qPCR assay. As expected, there was a  
216 significant inhibition in the recovery of the AccuPlex viral RNA from all surface materials  
217 swabbed, ranging from 50% recovery for stainless-steel to only 4% and 8% for Amerstat and the  
218 painted surfaces, respectively (*Figure 5*). Wood, copper, and plastic surfaces exhibited  
219 intermediate recovery of viral particles at a level of ~20%. On average, the recovery of AccuPlex

220 viral RNA from the stainless-steel was significantly higher than all other tested surfaces ( $p=0.05$   
221 to 0.004), but the AccuPlex RNA recovery was more variable with a range from 15% to 100%.  
222 Barring one or two outliers, the recovery from plastics was consistent (*Figure 5*).

223 To ascertain whether the decreased AccuPlex viral RNA recovery was due to the interaction  
224 of the environmental debris with the organics in extraction reagents, the post-extract of the six  
225 materials were spiked with 500 copies of synthetic fragments obtained from Integrated DNA  
226 Technologies (IDT) prior to being subjected to RT-qPCR. In contrast to the results above, which  
227 showed large inhibition, amplification of the spiked synthetic IDT fragments after the RNA  
228 extraction was largely unaffected. The copper resulted in the lowest recovery at 77%, followed  
229 by plastic, wood, and painted surfaces (~84%), while the stainless-steel and the Amerstat  
230 exhibited 90% recovery when compared to the control (*Figure 5, Supplemental Figure 2*). These  
231 results underscore how the type of environmental surface can influence the recovery of viral  
232 molecules, while the RNA purification kit chemistry might account for a small percentage of  
233 such inhibition.

#### 234 *Validation of E2E Process by an Independent Laboratory*

235 The E2E assay was repeated using the same materials by an independent laboratory for  
236 reproducibility and verification purposes. The independent evaluation included LOD  
237 determination of RT-qPCR assay, RNA extraction efficiency of automated system/manual kits,  
238 and recovery of NATrol viral particles from various built environment material surfaces. The  
239 results of the second laboratory evaluation were comparable and or equivalent to the results  
240 presented here. A standalone report is included in Data Set-1.

#### 241 *Built Environment Study Testing SARS-CoV-2 from Environmental Surfaces*

242 The E2E protocol developed during this study could confirm viral presence from built  
243 environment surfaces only when  $\geq 1,000$  viral particles per  $25 \text{ cm}^2$  were present due to the losses  
244 associated with swab collection, transportation solution, RNA extraction, and material surface  
245 retention. Despite these limitations, the combination of using Isohelix swab, DRS as  
246 transportation medium, automated RNA extraction, and RT-qPCR assay was determined to be  
247 the best available E2E protocol during March 2020 to reproducibly detect and measure SARS-  
248 CoV-2 from built environment surfaces. The E2E process implemented during this study are  
249 shown in *Figure 6*. The samples collected were from seven different materials found in 10  
250 buildings, including stainless steel, Amerstat, plastic, copper, and painted surfaces. None of the  
251 368 samples collected tested positive for SARS-CoV-2 (i.e., RT-qPCR amplification for N1 gene  
252 was BDL) using the E2E process developed during this study. Since the detection sensitivity of  
253 the E2E process implemented was  $1,000$  viral particles per  $25 \text{ cm}^2$ , the samples collected from  
254 built environmental surfaces were either devoid of the targeted virus or BDL of the E2E assay.

## 255 **Discussion**

256 The current clinical method for screening potential SARS-CoV-2 virus patients require an  
257 initial throat and or nasopharyngeal swab sample collection (9). Unlike clinical samples, fomites  
258 and high-touch surfaces that become contaminated with the virus display lower concentrations of  
259 the virus (10), which are often difficult to detect due to method limitations and, in some cases,  
260 inhibitory materials. For this reason, robust methods are imperative for the recovery and  
261 detection of SARS-CoV-2 from environmental surfaces. Previous studies have analyzed a variety  
262 of methods for viral recovery from surfaces (11); however, there are substantial number of  
263 variables that can impact collection, processing, and quantification of viral particles. Despite the  
264 World Health Organizations “How To” guide for SARS-CoV-2 surface sampling in hospital

265 settings, there has not been a comprehensive study that adequately addresses all the issues  
266 associated with an E2E assay for SARS-CoV-2.

267 During this study, Isohelix swabs were selected over Copan swabs due to easier handling and  
268 higher sensitivity for sample collection, and this approach has been successfully used by other  
269 studies (12). Furthermore, our results demonstrated that automated RNA extraction was as  
270 efficient (13, 14) as manual kits for extracting synthetic SARS-CoV-2, which has been  
271 previously noted using phenol-chloroform (15).

272 At the outset of this study, in February 2020, there were several molecular methods available  
273 for assaying the virus in a given sample. Various reports demonstrated well-established  
274 techniques, such as RT-qPCR (16), RT-LAMP (1), polyA RNA-seq (17), ribo-depletion RNA-  
275 seq and MeRIP-seq (18), direct RNA sequencing (19), capture panel / amplicon (20), and digital  
276 droplet PCR (ddPCR) (21). While each of these techniques has its strengths and merits, in the  
277 context of a diverse, low-biomass sample, each have their own shortcomings, which limit their  
278 use for environmental surveillance applications. This includes elements such as detection limits,  
279 costs, inhibitor affects, input volumes, result type, or ability to validate a positive result.

280 However, despite these shortcomings, two distinct molecular technologies (RT-qPCR and RT-  
281 LAMP assay) evolved to become part of the mainstream research toolkit for both clinical and  
282 environmental testing (add mason wired paper here). The benefits of these assays, when run in  
283 tandem, help resolve data associated with the more challenging and complex environmental  
284 sample type to accurately detect and quantify SARS-CoV-2 from various surface materials.

285 While comparing RT-qPCR, RT-LAMP, and ddPCR to detect SARS-CoV-2 from surface  
286 samples, ddPCR was found to be the most accurate and repeatable diagnostic tool. However,  
287 ddPCR is more expensive and requires a specialized ddPCR instrument. In contrast, the RT-

288 LAMP assay is faster and less labor intensive than ddPCR, is relatively inexpensive, and requires  
289 minimal instrumentation to operate (e.g., a heat block, water bath or thermocycler). The results  
290 of the RT-LAMP assay are colorimetric and the low infrastructure requirements make the assay  
291 ideal for field testing as demonstrated in past studies (22, 23). Since RT-LAMP is a narrow range  
292 semi-qualitative assay, accurate quantification is best performed by RT-qPCR; the gold standard  
293 for viral RNA detection (24-26). For our studies, we selected RT-qPCR for its wide dynamic  
294 range, throughput, and sensitivity (2 copies/ $\mu$ L) as the primary analysis tool, with RT-LAMP as  
295 the confirmatory assay.

296       Once an infected person begins shedding SARS-CoV-2 viral particles, the primary route of  
297 infection is via respiration; either through droplets or aerosols that are expelled during normal  
298 speech, respiration, and especially sneezing, and unintentionally inhaled by even healthy  
299 individuals (27). Although the virus appears to be primarily transmitted through air, SARS-CoV-  
300 2 can remain viable on surfaces for up to 72 hours (6, 7). Thus, similar to other respiratory  
301 viruses (28), it is likely that a major route of SARS-CoV-2 infection comes from contact with  
302 infected surfaces followed by inadvertent touching of the face and mouth. This pattern was  
303 observed in a study in a Wenzhou, China, where numerous individuals became infected, despite  
304 not having any direct contact with known patients (29). These findings, in combination with  
305 virus longevity on surfaces, strongly suggest that transmission is not just limited to aerosols.  
306 Additionally, preliminary research suggests that the infective dose is lower for SARS-CoV-2 in  
307 comparison to other respiratory infections (30, 31). These findings highlight the importance of  
308 effective environmental surveillance, surface monitoring, and proper sanitization methods to  
309 eliminate the virus.

310 In this study, we analyzed several environmental surface materials that were inoculated with  
311 a known concentration of SARS-CoV-2 viral reference standard to determine the recovery  
312 efficiencies for each material. While each material has characteristics that contribute to recovery,  
313 surface roughness and hydrophobicity are important contributors. It has been reported that  
314 surface roughness is a key mitigating factor for lower recovery of biological materials (32). For  
315 the test surfaces evaluated in this study, FRP had a textured surface and resulted in a lower  
316 NATrol viral recovery. Even though the PETG surface had similar surface roughness as BSS and  
317 PSS, the surface texture of PETG might have enabled the recovery of more virions. This was  
318 evident from visual observations revealing that the dried virus inoculum was easily dissociated  
319 and resulted in higher recoveries—a likely result of both the smoothness and hydrophobicity.

320 The decreasing amount of recoverable NATrol viral particles over time from the surface  
321 materials are likely attributed to the combination of desiccation time (Day 1 to 8) and the use of a  
322 disinfectant. Unlike all other materials, PSS demonstrated nearly the same RNA copy numbers  
323 persisting from Day 1 desiccation until Day 8 post-bleach. This might be due to the RT-qPCR  
324 method, which was targeting only 67 to 71 bp amplicons that could still easily be detected from  
325 virion fragments degraded by the disinfectant. Despite desiccation, the chemical nature of the  
326 paint associated with PSS material might have allowed viral fragments to persist even after  
327 cleaning with bleach. Furthermore, after applying bleach, the pigmentation of the paint was  
328 altered indicating a chemical reaction had occurred, which may have enabled easier removal of  
329 viral particles from the surfaces. Similarly, recovery of viral fragments was documented on the  
330 cruise ship *Diamond* after hypochlorite disinfection of contaminated rooms (33). These  
331 surprising positive results were likely due to the detection of degraded RNA fragments still being  
332 detected in the short amplicon RT-qPCR method. Due to short fragment amplification, even

333 significantly degraded RNA can be detected. In order to avoid these false positive results after  
334 the bleach treatments, samples should be tested using an alternative technique that targets longer  
335 RNA fragments, such as RT-LAMP.

336 To detect the high concentration of SARS-CoV-2 virus in clinical samples, it has been shown  
337 that direct amplification was possible with a maximum sample input of 2  $\mu\text{L}$  (34), whereas for  
338 environmental samples, a RNA purification step was mandatory due to the PCR inhibitory  
339 substances (13, 35). In addition, the concentration of the target molecules during RNA extraction  
340 would allow larger volume input (10-fold more) and increased the detection limit (2 copies per  
341  $\mu\text{L}$  of RNA extract). The collection of microorganisms from environmental surfaces have been  
342 documented to yield ~1 to 10% of biological materials due to issues in their removal from the  
343 surfaces as well as challenges associated with their dissociation from the swab (13, 35). During  
344 our study, the DRS chemistry in combination with environmental debris and RNA extraction has  
345 compounded losses an additional ~80%.

346 The E2E process implemented to survey SARS-CoV-2 virus presence for built environment  
347 surfaces (n=368 samples) exhibited no viral incidence (or <1,000 viral particles per 25  $\text{cm}^2$ ),  
348 which might be attributed to a highly controlled practices that were strictly adhered. These  
349 practices included but were not limited to admitting limited number of employees at a given time  
350 period, training “Safe at Workplace,” enforcing social distancing, wearing masks, practicing  
351 personal hygiene, and deep-cleaning of the environmental surfaces might have limited the viral  
352 contamination in these built environment surfaces. However, high traffic areas like hospitals,  
353 restaurants, cruise ships, and subways might show a different pattern(s) of viral adherence and  
354 persistence on fomites and surfaces (33, 36).

355 **Conclusion**



356 When examining all elements, the optimized E2E protocol implemented during this study  
357 indicated that only ~0.5 to 2% of the viral particles could be recovered from a variety of built  
358 environment surfaces and a minimum of 1,000 target molecules (viruses) per 25 cm<sup>2</sup> were  
359 needed to positively detect the virus. During this study, it was established that 1% of NATrol  
360 viral particles were recovered due to sample collection (swabs) and transportation solution  
361 (DRS), and that the RNA extraction step accounted for a further 90% loss of target molecules.  
362 These data reflect an overall E2E process efficiency of 0.1%, meaning that at least 1,000 copies  
363 need to be present for successful and reproducible detection of the SARS-CoV-2 virus from  
364 environmental surfaces.

## 365 **Methods**

### 366 *Inactivated Viral Reference Standards*

367 Two noninfectious, replication-deficient, encapsulated SARS-CoV-2 viral reference  
368 standards were used during this study, including the SeraCare AccuPlex (Milford, MA; Cat#:  
369 0505-0126), which contained the ORF1a, RdRp, E, and N sequences, and the ZeptoMetix  
370 NATrol (Buffalo, NY; Cat#: NATSARS(COV2)-ERC), which contained the entire RNA  
371 sequence. The AccuPlex and NATrol stocks were purchased at a concentration of 5 x 10<sup>3</sup> and 5  
372 x 10<sup>4</sup> viral particles per mL, respectively. These concentrations were confirmed in-house using  
373 digital droplet PCR (ddPCR) to be within 1.25% accurate (*Supplemental Table 1*).

374 Digital droplet PCR was performed using the BioRad QX200 instrument with the IDT  
375 primer/probe set for N1 and N2 with a modified probe quencher of Iowa Black ZEN/IBFQ (Cat#  
376 10006770) along with the BioRad One-Step RT ddPCR advanced supermix (Cat #1864021).  
377 Four methods were used for extraction of RNA from these reference materials (i.e., AccuPlex  
378 and NATrol) and consisted of the following: (a) direct lysis at 75°C for 5 min, (b) direct lysis of

379 a 1:1 mixture of sample to nuclease-free water (15ul:15ul) to which 3ul of Proteinase K (Qiagen)  
380 and 0.8ul of RNase inhibitor (Ribolock, Thermo Scientific EO0381) was added and incubated at  
381 50°C for 10 minutes followed by freeze thaw -80°C to + 95°C for 4 minutes, (c) utilization of  
382 viral RNA extraction kits such as the QIAamp Viral RNA Mini Kit (Qiagen, Germantown, MD;  
383 Cat #52904) and (d) the RNeasy Micro kit (Qiagen; Cat #: 74004). Volumes of 1, 2, 3, 5, and 7  
384 µL of the Accuplex and NATrol viral standards were analyzed using methods 1 and 2 for ddPCR  
385 to determine exact copy number.

### 386 *Swab and Viral Transport Medium Selection*

387 Two protocols, involving sample collection and transport medium, were tested during  
388 this study. The first protocol in *Supplemental Figure 3A* shows the procedure used for the  
389 Metagenomics and Metadesign of Subways and Urban Biomes (MetaSUB) and heritage NASA  
390 environmental sampling (12, 37, 38). The Copan Liquid Amies Elution Swab (ESwab, Copan  
391 Diagnostics, Cat.:480C) were used for environmental sampling. Sampled Copan swabs were  
392 stored on dry ice and transferred to the lab for further processing. Once in the lab, 300 µL of  
393 lysis buffer and 30 µL Proteinase K (Promega, Madison, WI) were added, and the swab was cut  
394 using sterile scissors to release the swab into the tube and mixed thoroughly using a vortex. The  
395 materials released from the swab were extracted using the Maxwell Viral Total Nucleic Acid  
396 Purification Kit (AS1330; Promega) or Zymo Quick-DNA/RNA viral kit (Cat# D7020). The  
397 protocol shown in *Supplemental Figure 3B* represents the reference protocol procedures used for  
398 a similar study design by the 2017–2019 MetaSUB research consortium (12). This process used  
399 the Isohelix MS-02 swab (Mini-Swab, Isohelix Cat.:MS-02) with 400 µL of DRS (R1100-250)  
400 preservative. Sampled Isohelix swabs were broken off into the sample tube and transferred to the  
401 lab at room temperature. Once in the lab, samples were extracted for nucleic acids via the

402 Promega Maxwell RSC 16. Among the swabs tested, Isohelix swabs demonstrated higher a  
403 recovery of microorganisms compared to the Copan swabs (39). Since no published reports were  
404 available on the efficiency of swabs specific for virus collection from environmental surfaces,  
405 data from the MetaSUB consortium (39) were adapted for this study. The DRS medium used  
406 throughout this study (DNA/RNA Shield -Zymo Corp) contains proprietary chemicals that  
407 inactivate the live virus and preserve RNA at a biosafety level 2 status.

#### 408 *Efficiency of Various Protocols in Extracting Viral RNA*

409 The standard methodology for viral RNA extraction in this study involved using the  
410 surface samples collected in DRS (~200  $\mu$ L), and processing them using the automated Maxwell  
411 RSC extraction platform (Promega Corp., Madison, WI) following the manufacturer's  
412 instructions for Maxwell RSC Viral Total Nucleic Acid Purification Kit (Promega). In brief, the  
413 collected swabs were vortexed for 2 min and treated with the lysis solution provided by the  
414 manufacturer (220  $\mu$ L of the lysis buffer per 100  $\mu$ L of sample and 200  $\mu$ L of the DRS solution).  
415 This extraction tube was incubated at room temp for 10 minutes and 56°C for additional 10  
416 minutes. Samples were transferred to Maxwell cartridges for extraction using the Viral Total  
417 Nucleic Acid program of the instrument. Purified RNA was eluted into a 60  $\mu$ L of UltraPure  
418 molecular grade water and divided into two aliquots. Samples were stored at -80°C with one  
419 aliquot used for downstream RT-qPCR analysis while the other aliquot was archived for later use.

420 In order to compare the efficiency of the extraction protocols and the effects of the  
421 DNA/RNA Shield on RNA amplification, four sets of extraction fluids were prepared in  
422 triplicate. Set one was prepared with 100  $\mu$ L of AccuPlex in 100  $\mu$ L of UltraPure water; set two  
423 was prepared with 100  $\mu$ L of AccuPlex in 100  $\mu$ L 95% EtOH; and sets three and four were  
424 prepared with 100  $\mu$ L of AccuPlex in DRS. Sets one, two, and three were all processed on the

425 Maxwell RSC as described above. Set four was processed using the Quick-DNA/RNA Viral Kit  
426 (Zymo Research, Irvine, CA) following the manufacturer's protocol. Purified RNA was eluted in  
427 60  $\mu$ L of UltraPure water.

#### 428 *Synthetic RNA and Limit of Detection for RT-qPCR*

429 Two synthetic nucleic acid reference samples were used to generate standard curves for the  
430 RT-qPCR reactions: (i) 2019-nCoV N Positive DNA Control (10006625) from Integrated DNA  
431 Technologies (IDT) (40) and (ii) SARS-CoV-2 RNA Control 2 (MN908947.3) from Twist  
432 Biosciences (San Francisco, CA). The IDT standard consisted of control plasmids containing the  
433 complete nucleocapsid gene from SARS-CoV-2, while the Twist standard consisted of six  
434 synthetic 5kb ssRNA section of the viral genome. Both IDT and Twist contain the nucleocapsid  
435 gene and can be amplified by either N1 or N2 primer sets, producing amplified products that  
436 have lengths of 72 bp or 67 bp, respectively. Comparison of N1 and N2 primers using the IDT  
437 and Twist BioSciences synthetic standards showed that all combinations of the primers and  
438 standards had highly reproducible amplification quantities across log dilutions, with N1  
439 demonstrating a slightly higher efficiency amplification curve. (*Supplemental Figures 4A–E*).  
440 Hence, only the N1 primer set was used for developing the E2E protocol. Samples that resulted  
441 in a N1 positive results were further confirmed with the N2 primer set. A significantly higher  
442 viral copy number was detected using the IDT reference material (1.28-fold) in comparison to  
443 Twist ( $P < 0.05$ ) when assessed with RNA extracted from AccuPlex as a benchmark control  
444 (*Supplemental Figure 4E*).

445 To determine the limits of detection of the RT-qPCR assay, a two-fold dilution series from 0  
446 to 200 viral RNA copies per reaction volume (5 $\mu$ L; 12 replicates), were conducted and indicated  
447 a LOD of 10 viral RNA copies per 5  $\mu$ L reaction volume (2 copies/ $\mu$ L; *Supplemental Figure 5A*).

448 Among the 12 replicates that theoretically contained one viral RNA copy (5 copies/5 $\mu$ l), five did  
449 not reach the cycle threshold (Ct) and were thus considered as BDL. All no template controls  
450 (NTC) were negative. As expected, the standard deviation of Ct values increased as the molecule  
451 concentration decreased (<10 copies) (*Supplemental Figure 5B*).

#### 452 *Optimization of RT-qPCR Assay*

453 qPCR was carried out with the extracted viral RNA from the sample using the Luna  
454 Universal Probe One-Step RT-qPCR Kit (#E3006, New England BioLabs [NEB], USA) as per  
455 the manufacturer's protocol for Applied Biosystems real-time instruments. N1 and N2 IDT  
456 primers (2019-CoV CDC EUA Kit, Integrated DNA technologies) designed for CDC SARS-  
457 CoV-2 qPCR probe assays were used for all reaction setups. The kit consists of all published  
458 SARS-CoV-2 assays in the CDC's recommended working concentration. The final 20  $\mu$ L  
459 reaction mix also included Antarctic Thermolabile UDG (Uracil-DNA Glycosylase) to prevent  
460 sample cross contamination. The IDT SARS-CoV-2 Plasmid DNA Control was used to generate  
461 a log<sub>10</sub> standard curve from 1 to 10<sup>5</sup> copies in triplicate. The AccuPlex SARS-CoV-2 reference  
462 material was used as an extraction control and treated as an "unknown" sample for each analysis.  
463 A QuantStudio 6 Flex Real-Time PCR Detection System was used for all RT-qPCR runs.  
464 Cycling conditions were: reverse transcription, 55°C (10 min, 1X); initial denaturation, 95°C (1  
465 min, 1X); and 40 cycles of 95°C (15 sec), 60°C (60 sec) plus plate read. The N1 gene was used to  
466 determine the number of viral particles in a sample. NTCs, a reaction mixture with molecular-  
467 grade water substituted for the sample, were run on each RT-qPCR plate to serve as negative  
468 controls. Standard curve and quantification were carried out using the Design and Analysis  
469 Software Version 2.4.1, for QuantStudio 6/7 Pro systems.

470 There are some unresolved issues with the RT-qPCR, which repeatedly detected higher  
471 amounts of AccuPlex and NATrol in standard controls than the quantity that was being measured  
472 by dd-qPCR. Supplemental Figure 6A-B shows the number of copies per mL of AccuPlex and  
473 NATrol that were calculated based on RT-qPCR runs. The red lines demarcate the reported  
474 concentration of viral particles for AccuPlex and NATrol. Supplemental Figure 6C shows that  
475 there was a 2.69-fold higher concentration of viral particles for AccuPlex and 3.5-fold higher for  
476 NATrol.

#### 477 *RT-LAMP Assay*

478 A 5  $\mu$ L aliquot of each sample was analyzed in triplicate using the RT-LAMP assay with  
479 the WarmStart RT-LAMP reagent (M1800S NEB Inc Ipswich MA) and the N2/E primer mix  
480 against the nucleocapsid envelop protein gene. A custom primer mix for the final primer mix  
481 included 40 mM guanidine hydrochloride which increased the sensitivity as previously described  
482 (41). All samples were incubated at 65°C for 42 min and photographed. Sample were quantified  
483 using spectrofluorimetry with the (Qubit. Broad Range DNA kit; ThermoFisher Waltham, MA)  
484 Titrations were performed on both AccuPlex and NATrol viral particles for estimating copy  
485 numbers. Direct RNA extraction was performed by mixing viral reference particles at a ratio of  
486 1:1 (15  $\mu$ L to 15  $\mu$ L to water) and adding 1  $\mu$ L of an RNase inhibitor (RiboLock-ThermoFisher  
487 EO0381) and 3  $\mu$ L of Proteinase K (Qiagen Germantown Maryland), with incubation at 50°C for  
488 10 min followed by immediately freezing at -80°C. After freezing, the controls were  
489 immediately incubated at 95°C for 4 min, followed by duplicate titrations into the RT-LAMP  
490 reaction master mix and incubation at 65°C for 42 min.

#### 491 *Surface Materials Tested and Coupon Fabrication*

492 Four of the most common high-touch surface materials were used in this study including bare  
493 302 stainless steel (BSS), painted 302 stainless steel (PSS; white acrylic paint 168130-Rust-  
494 Oleum, Vernon Hills, IL), polyethylene terephthalate modified with glycol (PETG), and  
495 fiberglass-reinforced plastic (FRP). All materials were smooth on a macroscale, except for FRP,  
496 which exhibited an irregular, textured surface. These materials were fabricated as test "coupons"  
497 of 25 cm<sup>2</sup> square at Jet Propulsion Laboratory (JPL) and sand tumbled to deburr. Throughout,  
498 coupons were handled carefully as to limit surface damage and scratching.

#### 499 *Precision Cleaning of the Test Coupons*

500 Unless otherwise indicated, all precision cleaning was performed in a Class 100 biohazard  
501 hood or a Class 100 laminar flow bench. Care was taken in handling, and high-grade chemicals  
502 were used to minimize contamination. Coupons were precision cleaned based on each individual  
503 material's best practices, as outlined in JPL's standard protocols (42). In short, BSS was cleaned  
504 per JPL D-51981 type IV (subsequent baths of solvent, detergent AquaVantage 815 GD; Brulin  
505 Holding Company, Indianapolis, IN), alkaline, and final passivation). The passivation consisted  
506 of a 30-min exposure to 5 M nitric acid at 24°C. Due to the paint's associated chemical attributes  
507 and susceptibility to solvents, PSS was rinsed with deionized water. The FRP wood laminate and  
508 PETG were both cleaned per JPL D-51981 type V method C (solvent bath followed by deionized  
509 water rinse). After cleaning, the product cleanliness level was tested to the level 100 (which  
510 means particles of <0.5 µm not exceed 100 particle counts). The cleaned test coupons were  
511 individually sealed in an antistatic Amerstat bag, until use.

#### 512 *Inoculation of Surface Materials (Test Coupons)*

513 Precision-cleaned coupons were opened aseptically in a biosafety cabinet and placed into  
514 individual, sterile Petri dishes. Aliquots of 10 µl of the NATrol control were spotted (n=10) onto

515 each test coupon in evenly spaced rows of 3, 4, and 3 spots and covered with a lid. Triplicate  
516 coupons of each of the following material types were prepared, including several controls: (i) a  
517 BSS coupon remained uninoculated (NC BSS) and were processed alongside as a negative  
518 control; (ii) a swab negative control in DRS; (iii) a swab with 5,000 copies of NATtrol in DRS;  
519 and (iv) 5,000 copies of NATtrol control extracted directly from Maxwell. All test coupons were  
520 loaded into a modified GasPak System, Anaerobic Jar 150 LG (Cat#: 260607; Becton Dickinson,  
521 Franklin Lakes, NJ) with the palladium catalyst removed and a valve port drilled into the top of  
522 the lid; no desiccation beads or reactants were added. The lid port was hooked up to a vacuum  
523 line to provide negative pressure on the jar. Coupons were dried at room temperature for 18  
524 hours, sampled, and immediately extracted for RNA (Day 1; initial collection). After initial  
525 swabbing, coupons were stored at room temperature for 24 hours at standard pressure, and  
526 swabbed again with a fresh swab, followed by viral RNA extraction (Day 2; secondary  
527 collection). Coupons were subsequently stored at room temperature and standard pressure for  
528 another 5 days, after which coupons were treated with 10% bleach (0.6% v/v sodium  
529 hypochlorite) using Kimwipes (Kimberly-Clark, Irving, TX) using a wiping pattern vertically,  
530 horizontally, and diagonally. Coupons were allowed to dry for 30 min, swabbed, and extracted  
531 for RNA (Day 8; collection after bleach treatment).

### 532 *Sample Collection from Coupons or Built Environmental Surfaces*

533 Test coupon were sampled over a 25 cm<sup>2</sup> area using Isohelix MS-02 buccal swabs (Cell  
534 Projects, Kent, UK). Prefilled 2 mL tubes containing 200 µL of DRS and labeled with a unique  
535 barcode (Cat. No.: R1100-96-1) were used for each sample. The Isohelix swab was dipped into  
536 DRS solution for 15 s prior to sampling to ensure the swab was sufficiently moistened. The  
537 moistened swab was then held against the sample surface at a 45-degree angle and dragged in a



538 raster pattern across the 25 cm<sup>2</sup> area. To ensure good coverage over the sample area, the raster  
539 pattern was repeated three times in different directions (horizontal, vertical, and diagonal),  
540 rotating the swab head 180 degrees between the horizontal and vertical passes. The swab was  
541 held to the surface perpendicular to the direction of travel to ensure that the maximal surface area  
542 was covered by the swab during each pass in the raster pattern. After sample collection, each  
543 swab head was transferred into the same barcoded tube used to pre-moisten the swab by  
544 aseptically breaking and twisting the head off into the tube. Sample specific metadata (e.g.,  
545 surface type and finish) were recorded for each barcoded tube. Environmental sampling of built  
546 environment surfaces was conducted in an identical manner. Environmental samples and field  
547 control samples were collected in a similar manner, but instead of dragging the moistened swab  
548 across a surface, the moistened swab for the field control was waved in the air for 2 min prior to  
549 breaking the head off into a barcoded tube. After collection of all samples, DRS collection tubes  
550 were stored at room temperature for up to three hours before RNA extraction.

#### 551 *Environmental Debris in the Recovery of Viral Particle/RNA*

552 Various materials, including metal, Amerstat, plastic, wood, copper plate, and painted  
553 surface, were tested to assess whether the debris associated with the environmental surface  
554 affected the recovery and detection of the viral RNA. Each surface was sampled with two swabs,  
555 which were preserved in DRS. The DRS from both collection tubes corresponding to one type of  
556 the environmental surface was pooled together, mixed, and divided into two 200 µL aliquots.  
557 One aliquot was inoculated with 100 µL of AccuPlex control and the other with 100 µL of  
558 UltraPure water and extracted using the Maxwell RSC using the protocol for the RT-qPCR  
559 analysis. The percent recovery for each tested material was determined when compared to the

560 control containing 100  $\mu$ L of AccuPlex SARS-CoV-2 in 200  $\mu$ L of UltraPure water. Three  
561 technical RT-qPCR replicates of biological samples were used for the analysis.

#### 562 *Inhibition of Maxwell Extraction Chemistry in the Recovery of Viral Particle/RNA*

563 Test surfaces were evaluated to determine if any RNA extraction inhibition was observed for  
564 the AccuPlex viral particles using the Maxwell RSC system. In order to determine the potential  
565 effect of the Maxwell RSC kit, 500 copies of the IDT synthetic fragments (2019-CoV N Positive  
566 Control, Integrated DNA Technologies, Inc., San Jose, CA) were added to each test reaction and  
567 5  $\mu$ L of each extracted sample. 20  $\mu$ L of the Luna master mix (Cat#: E3006; NEB, Ipsich MA)  
568 was added, the plate sealed and analyzed using the QuantStudio 6F instrument. The percent of  
569 the inhibition for each tested material was determined by comparing to the control containing  
570 500 copies. Three technical RT-qPCR replicates of biological samples were used for the analysis.

#### 571 *Materials Associated Debris and Chemistry Inhibition*

572 In order to determine whether debris or chemistry associated with the built environment  
573 surface materials contain PCR inhibitors, uninoculated test coupons were swabbed following the  
574 standard swabbing procedure outlined above. The swabs were transferred to a tube containing  
575 DRS and 100  $\mu$ L of the NATtrol viral particles. Appropriate negative and positive controls were  
576 also included. Sample were then extracted for RNA using the Maxwell RSC and were analyzed  
577 via RT-qPCR. Inhibition was determined by comparison of the extraction ratios between positive  
578 control and the sample reaction mixtures.

#### 579 *Development of SWAB Metadata Generation*

580 For the field data collection and associated metadata characteristics of samples, JPL  
581 Information and Technology Solutions Directorate created a custom mobile application (Safe

582 Workspace Analysis Barcode Scanner, or SWABS) that uses an iPhone to capture tracking  
583 metadata at each stage of the sample collection and analysis process. The vendor-provided  
584 barcode of each sample container was chosen as the unique identifier of each sample tracked  
585 through each phase of analysis. In the first phase (sampling), the container barcode was scanned  
586 and relevant metadata such as the name of the collection personnel, location, surface material  
587 properties, time of collection, material lot numbers, and optional description details were  
588 recorded for each sample. To accelerate data entry and eliminate human errors, barcode scanning  
589 with the iPhone camera was used to exactly identify each sample, and data in common were  
590 retained and automatically reused. In the second phase (RNA extraction), the sample was  
591 scanned once again, and details of the Maxwell machine identifier, extraction tip size, and lot  
592 numbers were added. For the third phase (archival), analysts added details of the cryo box  
593 location, extraction tip size, and lot numbers for each sample. At the final qPCR stage, the record  
594 was completed with the qPCR machine identifier, extraction tip size, and lot numbers, as well as  
595 the Ct score and copy number determined by the analysis. At each stage of the analysis  
596 procedure, the operations procedure version number was also recorded to track which  
597 documented procedure was followed at the time when each sample was processed. All of these  
598 sample processing data were gathered and stored in a centralized database at JPL. Leveraging  
599 this database, the SWABS web application makes these data accessible for viewing, searching,  
600 or editing, as well as providing reporting capabilities to communicate and summarize any of the  
601 data on demand. Although the SWABS application streamlines and improves the accuracy of the  
602 processing metadata recording process as a whole, it is most advantageous during the initial  
603 sample collection phase owing to its mobile platform that allows its users to move around freely  
604 within the workspace environment while minimally encumbered by support equipment.

605 *Statistical Analyses*

606 All statistical analyses were performed using GraphPad Prism Version 8.2.0 (GraphPad  
607 Software, San Diego, California USA). Specifically, Welch's *t*-test and a two-way ANOVA  
608 followed by a post-hoc sample correction were computed. Outliers were screened using the rOut  
609 method from the robustX R package (<https://CRAN.R-project.org/package=robustX>).

610 **Acknowledgments**

611 Part of the research described in this publication was carried out at the Jet Propulsion  
612 Laboratory, California Institute of Technology, under a contract with NASA. Researchers  
613 associated with Biotechnology and Planetary Protection Group at JPL are acknowledged for their  
614 facility support.

615 The authors would like to thank Garry Burdick and Subbarao Surampudi (initiating the  
616 concept of COVID-19 surface testing), Soren Madsen (day to day management of the work flow),  
617 Roger Gibbs, Leon Alkalai, Timothy O'Donnell, and the JPL Management Council (financial  
618 support and directions), Mimi Ton (IRB clearance), Anton Ovcharenko (safety protocol  
619 development), Kerry Wisden, Marisa Gamboa, and Bill Kert (procuring chemicals and materials),  
620 Oscar Rendon Perez (coupon material preparation and precision cleaning). We would also like to  
621 thank Brent Mcwatters, Mark Powell, and the members of the JPL Information and Technology  
622 Solutions Directorate that rapidly created an iPhone app that was used for metadata collection  
623 during this project. We are indebted to the personnel involved in JPL shipping / receiving for  
624 their help during this pandemic and the facility managers associated with the surface collection  
625 locations. Additionally, Mikael Kubista from the TATAA Biocenter for helping to develop our  
626 RT-qPCR limit of detection protocols, thanks to MetaSUB consortium members (especially  
627 Benjamin Young) for generating the sample collection SOP, and Julie Dragon for RT-LAMP

628 assay SOP and continued support. Christopher Fleming and Frank Tansley are acknowledged for  
629 their timely support of procuring critical equipment and consumables. David Lee from JPL is  
630 thanked for critically reviewing the manuscript. © 2020 California Institute of Technology.  
631 Government sponsorship acknowledged.

### 632 **Ethics approval and consent to participate**

633 Not applicable.

### 634 **Funding**

635 This research was supported by the JPL Director Discretionary Funds for COVID-19 projects  
636 which also funded a portion of the fellowship of CWP, AB and JMW. The funders had no role in  
637 study design, data collection and interpretation, the writing of the manuscript, or the decision to  
638 submit the work for publication.

### 639 **Availability of data and materials**

640 Not Applicable.

### 641 **Disclaimer**

642 This manuscript was prepared as an account of work sponsored by NASA, an agency of the  
643 US Government. The US Government, NASA, California Institute of Technology, Jet Propulsion  
644 Laboratory, and their employees make no warranty, expressed or implied, or assume any liability  
645 or responsibility for the accuracy, completeness, or usefulness of information, apparatus, product,  
646 or process disclosed in this manuscript, or represents that its use would not infringe upon  
647 privately held rights. The use of, and references to any commercial product, process, or service  
648 does not necessarily constitute or imply endorsement, recommendation, or favoring by the US  
649 Government, NASA, California Institute of Technology, or Jet Propulsion Laboratory. Views

650 and opinions presented herein by the authors of this manuscript do not necessarily reflect those  
651 of the US Government, NASA, California Institute of Technology, or Jet Propulsion Laboratory,  
652 and shall not be used for advertisements or product endorsements.

653 Work for this study was also completed by Biotia, Inc. Biotia and its employees make no  
654 warranty, expressed or implied, or assume any liability or responsibility for the accuracy,  
655 completeness, or usefulness of information, apparatus, product, or process disclosed in this  
656 manuscript, or represents that its use would not infringe upon privately held rights.

### 657 **Authors' contributions**

658 KV coordinated with all authors in designing the concept, executed the study, implemented  
659 the project, involved in the data analyses, and wrote the manuscript. CWP was involved in  
660 establishing the RT-qPCR assay with NKS, and was instrumental in executing the E2E process,  
661 and wrote the manuscript along with KV. NKS carried out the QA/QC of RT-qPCR assay and  
662 analyzed the data. ST helped design and setup the experimental methods, provided training,  
663 conducted RT-LAMP, qPCR, ddPCR, interpretation of data, and assisted in writing and editing  
664 the manuscript. PL carried out lab work pertaining to protocol optimization of RT-LAMP, qPCR,  
665 and ddPCR assays as well as Sanger sequencing. NKS, JMW, CWP, RH, and KC carried out  
666 environmental sampling from various built environment surfaces. JMW managed metadata  
667 collection and curation, helped analyze data, and was crucial in surface sampling as well as  
668 drafting portions of the manuscript. AB performed RNA extraction of the collected samples,  
669 contributed to data analysis, interpretation, and drafted parts of the manuscript. CU helped  
670 analyze the data, write the paper, and assisted in the study design. RH helped with sample  
671 collection and contributed in writing about the swab and DNA extraction methodology process  
672 selection for the paper. KC planned and coordinated built-environment sampling and supported

673 data collection during sampling. AS and PV carried out RT-qPCR assays and contributed to the  
674 LOD determination. BC oversaw the project and provided critical input for the QC/QA analyses  
675 of RT-qPCR data, and edited the manuscript. NO coordinated work at Biotia, where a second  
676 laboratory performed verification out, helped design of the additional procedures used. MCR  
677 performed experiments, interpret analyzed results, and contributed to writing validation portion  
678 of the Data Set-1. MCR helped design additional experiments, performed experiments, analyzed  
679 results and contributed to writing the validation portion of the Data Set-1. DB conducted  
680 experiments pertaining to the selection of swabs and DRS and wrote these portions in the  
681 manuscript and reviewed the manuscript. CM coordinated with KV and helped to design the  
682 concept, provided insights about the MetaSUB protocol to get implemented.

### 683 **Consent for publication**

684 All authors that participated in this study have reviewed the results, read the final manuscript,  
685 and given their consent for publication.

### 686 **Competing interests**

687 NBO, MCR, and CM hold shares in Biotia, a company that conducts infectious disease  
688 diagnostics and characterization. All other authors declare that they have no competing interests.

689

## 690 References

- 691 1. Kashir J, Yaqinuddin A. 2020. Loop mediated isothermal amplification (LAMP) assays  
692 as a rapid diagnostic for COVID-19. *Med Hypotheses* 141:109786-109786.
- 693 2. Ru H, Yang E, Zou K. 2020. What do we learn from SARS-CoV-1 to SARS-CoV-2:  
694 Evidence from global stock markets. Available at SSRN 3569330.
- 695 3. de Oliveira Araújo FJ, de Lima LSA, Cidade PIM, Nobre CB, Neto MLR. 2020. Impact  
696 of Sars-Cov-2 And its reverberation in global higher education and mental health.  
697 *Psychiatry Res*:112977.
- 698 4. Han Q, Lin Q, Ni Z, You L. 2020. Uncertainties about the transmission routes of 2019  
699 novel coronavirus. *Influenza Other Respi Viruses* 14:470-471.
- 700 5. West R, Michie S, Rubin GJ, Amlôt R. 2020. Applying principles of behaviour change to  
701 reduce SARS-CoV-2 transmission. *Nature Human Behaviour*:1-9.
- 702 6. Van Doremalen N, Bushmaker T, Morris DH, Holbrook MG, Gamble A, Williamson BN,  
703 Tamin A, Harcourt JL, Thornburg NJ, Gerber SI. 2020. Aerosol and surface stability of  
704 SARS-CoV-2 as compared with SARS-CoV-1. *N Engl J Med* 382:1564-1567.
- 705 7. Jiang F-C, Jiang X-L, Wang Z-G, Meng Z-H, Shao S-F, Anderson B, Ma M-J. 2020.  
706 Detection of Severe Acute Respiratory Syndrome Coronavirus 2 RNA on Surfaces in  
707 Quarantine Rooms. *Emerging Infectious Disease journal* 26.
- 708 8. Kampf G, Todt D, Pfaender S, Steinmann E. 2020. Persistence of coronaviruses on  
709 inanimate surfaces and their inactivation with biocidal agents. *J Hosp Infect* 104:246-251.
- 710 9. Singhal T. 2020. A review of coronavirus disease-2019 (COVID-19). *The Indian Journal*  
711 *of Pediatrics*:1-6.
- 712 10. Goldman E. 2020. Exaggerated risk of transmission of COVID-19 by fomites. *Lancet*  
713 *Infect Dis* doi:10.1016/S1473-3099(20)30561-2.
- 714 11. Anderson RM, Fraser C, Ghani AC, Donnelly CA, Riley S, Ferguson NM, Leung GM,  
715 Lam TH, Hedley AJ. 2004. Epidemiology, transmission dynamics and control of SARS:  
716 the 2002-2003 epidemic. *Philos Trans R Soc Lond B Biol Sci* 359:1091-105.
- 717 12. Danko DC, Bezdán D, Afshinnekoo E, Ahsanuddin S, Alicea J, Bhattacharya C,  
718 Bhattacharyya M, Blekhman R, Butler DJ, Castro-Nallar E, Cañas AM, Chatziefthimiou  
719 AD, Chng KR, Coil DA, Court DS, Crawford RW, Desnues C, Dias-Neto E, Donnellan  
720 D, Dybwad M, Eisen JA, Elhaik E, Ercolini D, De Filippis F, Frolova A, Graf AB, Green  
721 DC, Lee PKH, Hecht J, Hernandez M, Jang S, Kahles A, Karasikov M, Knights K,  
722 Kyrpides NC, Ljungdahl P, Lyons A, Mason-Buck G, McGrath K, Mongodin EF,  
723 Mustafa H, Mutai B, Nagarajan N, Neches RY, Ng A, Nieto-Caballero M, Nikolayeva O,  
724 Nikolayeva T, Noushmehr H, Oliveira M, et al. 2019. Global Genetic Cartography of  
725 Urban Metagenomes and Anti-Microbial Resistance. *bioRxiv*  
726 doi:<https://doi.org/10.1101/724526>.
- 727 13. Kwan K, Cooper M, La Duc MT, Vaishampayan P, Stam C, Benardini JN, Scalzi G,  
728 Moissl-Eichinger C, Venkateswaran K. 2011. Evaluation of procedures for the collection,  
729 processing, and analysis of biomolecules from low-biomass surfaces. *Appl Environ*  
730 *Microbiol* 77:2943-2953.
- 731 14. Liu H, Gan Y, Yang B, Weng H, Huang C, Yang D, Lei P, Shen G. 2012. Performance  
732 evaluation of the Maxwell 16 System for extraction of influenza virus RNA from diverse  
733 samples. *PLoS One* 7:e48094.
- 734 15. Dimke H, Larsen SL, Skov MN, Larsen H, Hartmeyer GN, Moeller JB. 2020. Phenol-  
735 chloroform-based RNA purification for detection of SARS-CoV-2 by RT-qPCR:



- 736 comparison with automated systems. medRxiv  
737 doi:10.1101/2020.05.26.20099440:2020.05.26.20099440.
- 738 16. Wang Y, Kang H, Liu X, Tong Z. 2020. Combination of RT-qPCR testing and clinical  
739 features for diagnosis of COVID-19 facilitates management of SARS-CoV-2 outbreak. *J*  
740 *Med Virol* 92:538-539.
- 741 17. Kim D, Lee JY, Yang JS, Kim JW, Kim VN, Chang H. 2020. The Architecture of SARS-  
742 CoV-2 Transcriptome. *Cell* 181:914-921 e10.
- 743 18. Meyer Kate D, Saletore Y, Zumbo P, Elemento O, Mason Christopher E, Jaffrey Samie R.  
744 2012. Comprehensive Analysis of mRNA Methylation Reveals Enrichment in 3' UTRs  
745 and near Stop Codons. *Cell* 149:1635-1646.
- 746 19. Viehweger A, Krautwurst S, Lamkiewicz K, Madhugiri R, Ziebuhr J, Hölzer M, Marz M.  
747 2019. Direct RNA nanopore sequencing of full-length coronavirus genomes provides  
748 novel insights into structural variants and enables modification analysis. *Genome Res*  
749 29:1545-1554.
- 750 20. Hung SS, Meissner B, Chavez EA, Ben-Neriah S, Ennishi D, Jones MR, Shulha HP,  
751 Chan FC, Boyle M, Kridel R, Gascoyne RD, Mungall AJ, Marra MA, Scott DW,  
752 Connors JM, Steidl C. 2018. Assessment of Capture and Amplicon-Based Approaches  
753 for the Development of a Targeted Next-Generation Sequencing Pipeline to Personalize  
754 Lymphoma Management. *The Journal of Molecular Diagnostics* 20:203-214.
- 755 21. Lu R, Wang J, Li M, Wang Y, Dong J, Cai W. 2020. SARS-CoV-2 detection using  
756 digital PCR for COVID-19 diagnosis, treatment monitoring and criteria for discharge.  
757 medRxiv.
- 758 22. Parida M, Posadas G, Inoue S, Hasebe F, Morita K. 2004. Real-time reverse transcription  
759 loop-mediated isothermal amplification for rapid detection of West Nile virus. *J Clin*  
760 *Microbiol* 42:257-263.
- 761 23. Parida M, Santhosh S, Dash P, Tripathi N, Lakshmi V, Mamidi N, Shrivastva A, Gupta N,  
762 Saxena P, Babu JP. 2007. Rapid and real-time detection of Chikungunya virus by reverse  
763 transcription loop-mediated isothermal amplification assay. *J Clin Microbiol* 45:351-357.
- 764 24. Martin-Latil S, Hennechart-Collette C, Guillier L, Perelle S. 2012. Comparison of two  
765 extraction methods for the detection of hepatitis A virus in semi-dried tomatoes and  
766 murine norovirus as a process control by duplex RT-qPCR. *Food Microbiol* 31:246-253.
- 767 25. Dupont-Rouzeyrol M, Biron A, O'Connor O, Huguon E, Descloux E. 2016. Infectious  
768 Zika viral particles in breastmilk. *The Lancet* 387:1051.
- 769 26. de Crom SCM, Obihara CC, de Moor RA, Veldkamp EJM, van Furth AM, Rossen JWA.  
770 2013. Prospective comparison of the detection rates of human enterovirus and  
771 parechovirus RT-qPCR and viral culture in different pediatric specimens. *Journal of*  
772 *clinical virology : the official publication of the Pan American Society for Clinical*  
773 *Virology* 58:449-454.
- 774 27. Leung NH, Chu DK, Shiu EY, Chan K-H, McDevitt JJ, Hau BJ, Yen H-L, Li Y, Ip DK,  
775 Peiris JM. 2020. Respiratory virus shedding in exhaled breath and efficacy of face masks.  
776 *Nat Med* 26:676-680.
- 777 28. Boone SA, Gerba CP. 2007. Significance of fomites in the spread of respiratory and  
778 enteric viral disease. *Appl Environ Microbiol* 73:1687-1696.
- 779 29. Cai J, Sun W, Huang J, Gamber M, Wu J, He G. 2020. Indirect virus transmission in  
780 cluster of COVID-19 cases, Wenzhou, China, 2020.

- 781 30. Liu K, Chen Y, Lin R, Han K. 2020. Clinical features of COVID-19 in elderly patients: A  
782 comparison with young and middle-aged patients. *J Infect.*
- 783 31. MacIntyre CR. 2014. The discrepant epidemiology of Middle East respiratory syndrome  
784 coronavirus (MERS-CoV). *Environ Syst Decis* 34:383-390.
- 785 32. Elimelech M, Xiaohua Z, Childress AE, Seungkwon H. 1997. Role of membrane surface  
786 morphology in colloidal fouling of cellulose acetate and composite aromatic polyamide  
787 reverse osmosis membranes. *J Membr Sci* 127:101-109.
- 788 33. Yamagishi T. 2020. Environmental sampling for severe acute respiratory syndrome  
789 coronavirus 2 (SARS-CoV-2) during a coronavirus disease (COVID-19) outbreak aboard  
790 a commercial cruise ship. medRxiv  
791 doi:10.1101/2020.05.02.20088567:2020.05.02.20088567.
- 792 34. Bruce EA, Huang M-L, Perchetti GA, Tighe S, Laaguiby P, Hoffman JJ, Gerrard DL,  
793 Nalla AK, Wei Y, Greninger AL, Diehl SA, Shirley DJ, Leonard DGB, Huston CD,  
794 Kirkpatrick BD, Dragon JA, Crothers JW, Jerome KR, Botten JW. 2020. DIRECT RT-  
795 qPCR DETECTION OF SARS-CoV-2 RNA FROM PATIENT NASOPHARYNGEAL  
796 SWABS WITHOUT AN RNA EXTRACTION STEP. bioRxiv  
797 doi:10.1101/2020.03.20.001008:2020.03.20.001008.
- 798 35. Bargoma E, La Duc MT, Kwan K, Vaishampayan P, Venkateswaran K. 2013.  
799 Differential recovery of phylogenetically disparate microbes from spacecraft-qualified  
800 metal surfaces. *Astrobiology* 13:189-202.
- 801 36. Ong SWX, Tan YK, Chia PY, Lee TH, Ng OT, Wong MSY, Marimuthu K. 2020. Air,  
802 Surface Environmental, and Personal Protective Equipment Contamination by Severe  
803 Acute Respiratory Syndrome Coronavirus 2 (SARS-CoV-2) From a Symptomatic Patient.  
804 *JAMA* 323:1610-1612.
- 805 37. Kwan K, Cooper M, La Duc MT, Vaishampayan P, Stam C, Benardini JN, Scalzi G,  
806 Moissl-Eichinger C, Venkateswaran K. 2011. Evaluation of procedures for the collection,  
807 processing, and analysis of biomolecules from low-biomass surfaces. *Appl Environ*  
808 *Microbiol* 77:2943-53.
- 809 38. La Duc MT, Osman S, Venkateswaran K. 2009. Comparative analysis of methods for the  
810 purification of DNA from low-biomass samples based on total yield and conserved  
811 microbial diversity. *Journal of Rapid Methods & Automation in Microbiology* 17:350-  
812 368.
- 813 39. Danko DC, Bezdán D, Afshinnekoo E, Ahsanuddin S, Alicea J, Bhattacharya C,  
814 Bhattacharyya M, Blehman R, Butler DJ, Castro-Nallar E, Cañas AM, Chatziefthimiou  
815 AD, Chng KR, Coil DA, Court DS, Crawford RW, Desnues C, Dias-Neto E, Donnellan  
816 D, Dybwad M, Eisen JA, Elhaik E, Ercolini D, De Filippis F, Frolova A, Graf AB, Green  
817 DC, Lee PKH, Hecht J, Hernandez M, Jang S, Kahles A, Karasikov M, Knights K,  
818 Kyrpides NC, Ljungdahl P, Lyons A, Mason-Buck G, McGrath K, Mongodin EF,  
819 Mustafa H, Mutai B, Nagarajan N, Neches RY, Ng A, Nieto-Caballero M, Nikolayeva O,  
820 Nikolayeva T, Noushmehr H, Oliveira M, et al. 2019. Global Genetic Cartography of  
821 Urban Metagenomes and Anti-Microbial Resistance. bioRxiv  
822 doi:10.1101/724526:724526.
- 823 40. Corman VM, Landt O, Kaiser M, Molenkamp R, Meijer A, Chu DK, Bleicker T, Brünink  
824 S, Schneider J, Schmidt ML, Mulders DG, Haagmans BL, van der Veer B, van den Brink  
825 S, Wijsman L, Goderski G, Romette J-L, Ellis J, Zambon M, Peiris M, Goossens H,  
826 Reusken C, Koopmans MP, Drosten C. 2020. Detection of 2019 novel coronavirus

- 827 (2019-nCoV) by real-time RT-PCR. Euro surveillance : bulletin Europeen sur les  
828 maladies transmissibles = European communicable disease bulletin 25:2000045.
- 829 41. Butler DJ, Mozsary C, Meydan C, Danko D, Fook J, Rosiene J, Shaiber A, Afshinnekoo  
830 E, MacKay M, Sedlazeck FJ, Ivanov NA, Sierra M, Pohle D, Zietz M, Gisladottir U,  
831 Ramlall V, Westover CD, Ryon K, Young B, Bhattacharya C, Ruggiero P, Langhorst  
832 BW, Tanner N, Gawrys J, Meleshko D, Xu D, Steel PAD, Shemesh AJ, Xiang J, Thierry-  
833 Mieg J, Thierry-Mieg D, Schwartz RE, Iftner A, Bezdán D, Siple J, Cong L, Craney A,  
834 Velu P, Melnick AM, Hajirasouliha I, Horner SM, Iftner T, Salvatore M, Loda M,  
835 Westblade LF, Cushing M, Levy S, Wu S, Tatonetti N, Imielinski M, et al. 2020.  
836 Shotgun Transcriptome and Isothermal Profiling of SARS-CoV-2 Infection Reveals  
837 Unique Host Responses, Viral Diversification, and Drug Interactions. bioRxiv  
838 doi:10.1101/2020.04.20.048066:2020.04.20.048066.
- 839 42. McEnerney B. 2018. General Cleaning of Materials. Jet Propulsion Laboratory, California  
840 Institute of Technology, Pasadena, CA, USA.
- 841
- 842

## 843 **Figure Legends**

844 Figure 1: Influence of swab and DRS on viral RNA extraction efficiency. Equal quantities of the  
845 inactivated AccuPlex viral particles were extracted using a variety of initial extraction conditions  
846 and then quantified using RT-qPCR assay. The extraction conditions encompassed water with no  
847 swab (●), water with Isohelix swab (■), DNA/RNA Shield (DRS) with no swab (▼) DRS with  
848 Isohelix swab (◆). Each extraction condition was then divided by the average copy numbers  
849 generated from the water with no swab (theoretical highest yield) to get percent recovery and  
850 plotted with columns representing their mean percentage. Welch's t test was used to determine  
851 significant differences between extraction conditions, significance ( $p < 0.05$ ) denoted by '\*'.

852 Figure 2: Extraction kit efficiency. RNA extraction from AccuPlex viral particles was examined  
853 using Direct PCR (black column) and compared to four different combinations of storage liquids  
854 and extraction kits including Maxwell RSC Viral extraction kit with water (●), ethanol (EtOH;  
855 ■), and DRS (▼), as well as Zymo Quick-DNA/RNA Viral Kit with DRS (◆), followed by  
856 quantification using RT-qPCR assay. Values are expressed as nucleocapsid (N1) copy numbers  
857 in 5 $\mu$ L of RNA extract; all replicates are plotted as individual points, with presented as columns.  
858 Direct PCR was treated as 100% to calculate the extraction efficiency of the other extraction  
859 methods (recorded with in the columns). Significant differences were determined by Welch's t  
860 test, significance ( $p < 0.05$ ) denoted by '\*'.

861 Figure 3: Viral particle recovery from built-environment surface materials. (A) Image of the  
862 inoculated plates (BSS, PSS, FRP, and PETG) where inactivated viral particles (10  $\mu$ L of  
863 NATrol) were aliquoted 10 times on to four separate materials in triplicate. (B) Viral particles  
864 were either kept overnight at room temperature as liquid (Eppendorf tube was closed; Water No

865 Swab, ▲) or desiccated over night at room temperature in tubes (No Swab Desiccated ●) which  
866 were then sacrificed to extract RNA directly without removing from the surface. In addition,  
867 aliquots of viral particles that were not desiccated but inoculated in DRS and swab materials  
868 were also processed (DRS Swab, ■). (C) Viral particles were collected from the seeded surfaces  
869 with Isohelix swabs and DRS, extracted on the Maxwell RSC, and quantified using RT-qPCR  
870 assay. Viral RNA copy number for each condition was divided by an extraction control to  
871 calculate percent recovery for Day 1 (▼), Day 2 (●), and Day 8 post bleach (■). Statistical  
872 significance was determined by Welch's t test with significance ( $p < 0.05$ ) denoted by '\*'.

873 Figure 4: Comparison of RT-LAMP and RT-qPCR assays. (A) RT-LAMP assay limit of  
874 detection was carried for AccuPlex and NATtrol standards with both the colorimetric changes  
875 seen in the reaction (RT-LAMP Assay output) and the Qubit quantifications presented across a  
876 dilution series of viral particle number. The qualitative RT-LAMP assay output was determined  
877 based on color change from red to yellow in the presence of the target sequence, whereas RNA  
878 measurements of RT-LAMP assay reactions using Qubit give semi-quantitative values. Qubit  
879 values that were below 100 ng/μL were denoted as '-' and Qubit values that were above 150  
880 ng/μL were recorded as '+'. (B) Viral particles collected from built-environment surface  
881 materials (Figure 3 Day 1) were analyzed with the RT-LAMP and RT-qPCR assays. RT-LAMP  
882 Assay colorimetric output is presented alongside Qubit +/- result value, and RT-qPCR quantities.  
883 Values that were not tested were marked as not applicable (NA), and values that were  
884 undetectable were recorded as BDL.

885 Figure 5: Inhibition by field collected built-environment surface samples post RNA extraction.  
886 Field swab collection of diverse built-environment surface samples had their DRS vials spiked  
887 with inactivated viral AccuPlex particles prior to RNA extraction and quantification with RT-

888 qPCR. Differential amplification of Metal SS (●), Amerstat (●), Plastic (●), Metal Cu (●),  
889 Painted Surface (●), and Wood (●) was compared to a positive control (●) and reported as  
890 percent recovery compared to that positive control mean. Each column represents average  
891 percent recovery for respective surface type. Significance ( $p < 0.05$ ) denoted by ‘\*’, based on  
892 Welch’s t test.

893 Figure 6: Environmental surface testing using E2E protocol. The optimized E2E protocol for  
894 detecting SARS-CoV-2 virus on surfaces is a 5 part procedure: (1) Surface sample collection; (2)  
895 Viral transport medium; (3) RNA extraction; (4) RT-qPCR assay; and (5) Test results.

## 896 **Tables**

897 NA

898

## 899 **Supplemental Legends**

### 900 Supp. Fig 1: RT-qPCR Inhibition by Built-Environment Surface Materials

901 Uninoculated Built-Environment coupons were swabbed with Isohelix swabs and DRS, and then  
902 spiked with NATrol. RT-qPCR was performed after RNA extraction on the four sampled surface  
903 materials BSS (●), PSS (■), FRP (▼), PETG (◆), and water no swab (▲). Data is presented as  
904 percent RNA recovery for each material type as compared to a control inhibitor free NATrol  
905 RNA extraction. All replicates are plotted and columns represent mean percent recovery.  
906 Significant differences were determined between materials using Welch's t test, significance  
907 indicated by '\*'.

### 908 Supp. Fig 2: RT-qPCR Inhibition by Field Collected Built-Environment Surface Samples Post 909 RNA Extraction

910 RNA was extracted from the same diverse set of Built-Environment field samples as in Fig. 6.  
911 SARS-CoV-2 cDNA was added to each sample prior to RT-qPCR to determine the inhibitor  
912 carry-through impacts on amplification of Metal SS (●), Amerstat (●), Plastic (●), Metal Cu (●),  
913 Painted Surface (●), and Wood (●) and positive control (●). Data is presented as percent  
914 recovery compared to the positive control mean, while means for each surface type are presented  
915 as columns. Welch's t test determined significant differences between samples (\*').

### 916 Supp. Fig 3: Collection Tool Selection and Use of Transfer Media

917 Comparison of the MetaSUB sampling SOP of 2016 and 2017-19. A) SOP for MetaSUB  
918 sampling day 2016. Samples had to be transported on dry ice and kept cold at all times. Copan  
919 swab heads have been treated with lysis buffer, cut into a 1.5ml tube containing a filter,  
920 centrifuged to separate the lysate from the foamy swab, and combined with its sample associated



921 transport media. Those swab-specific treatments add approximately 1.5h per 96 samples to the  
922 extraction process. DNA extraction was performed using Promega Maxwell. B) SOP for  
923 MetaSUB sampling days 2017-19. Samples have been collected in DNA/RNA preservative  
924 (Zymo Shield) at room temperature. Isohelix swabs release species after lysis and vortex due to  
925 their hard surface. Samples collected in early 2017 have been extracted using the Promega  
926 Maxwell system while DNA extraction for samples received after mid-2017 has been outsourced  
927 to Zymo Research.

928 Supp. Fig 4: Comparison of Primer Sets and Viral Standards

929 CDC/NIH recommended SARS-CoV-2 nucleocapsid N1 (red) and N2 (blue) primer sets were  
930 tested in combination with both SARS-CoV-2 standards, IDT cDNA (◆) and TWIST RNA (●),  
931 over a log dilution from 10,000 copies to 1 copy (n=5) (A-D). The N1 primer set (A, C) had  
932 lower  $r^2$  values than N2 primer set (B, D); however, the IDT standard with both N1 and N2  
933 primer sets (A, B) had higher  $r^2$  values than the TWIST standard with N1 and N2 primer sets (C,  
934 D). The N1 primer set was used with IDT (●) and TWIST (■) to produce RT-qPCR standard  
935 curves that were intern used to quantitate five AccuPlex RNA extraction controls (S1-S5)  
936 amplified from 5  $\mu$ L of extracted RNA (B). The number of N1 RNA copies from individual  
937 extraction control replicates were plotted along with each controls' mean value.

938 Supp. Fig 5: RT-qPCR Limit of detection.

939 The inset figure shows RT-qPCR generated Ct values for the two-fold dilution series of IDT  
940 cDNA copies. The IDT dilution series are 200 (●), 100 (●), 50 (●), 25 (●), 10 (●), 5 (●), 1 (●),  
941 and no template control (●; NTC; negative control) (n=12). All replicates were positive when  
942 IDT was at higher concentrations (200 to 25 copies); however, 2, 5, and 12 replicates were



943 negative for the IDT at 10, 5, and 1 copies, respectively. Of these 12 replicates per IDT dilution,  
944 three representative amplification plots per IDT dilution are presented as normalized reporter  
945 value (Rn) by amplification cycle number (Cycle). Color coded labeled arrows point to each  
946 triplicate plot.

947 Supp. Fig 6: Quantification and Comparison of AccuPlex and NATrol Viral Particles

948 (A) AccuPlex and (B) NATrol. RT-qPCR extraction replicates are given in x-axis, and  
949 manufacturers' reported copy numbers are demarcated by red lines. (C) Values reported in the  
950 table include particle numbers reported by the manufacturers and RNA copy numbers  
951 determined by dd-PCR method and RT-qPCR assays. The fold-increase by RT-qPCR using IDT  
952 viral fragments as standard curve is depicted.

953 Supp. Table 1: Quantification and Comparison of Accuplex and NATrol Viral Particles by direct  
954 droplet qPCR

955 Multiple extraction methods were performed, including direct extraction and a variety of RNA  
956 extraction kits, followed by ddPCR to determine the precise quantity of N1 and N2 gene copies  
957 present in both Accuplex and NATrol viral particles.

958 Data Set-1: Independent Validation Report of E2E Protocol by a Second laboratory.

959

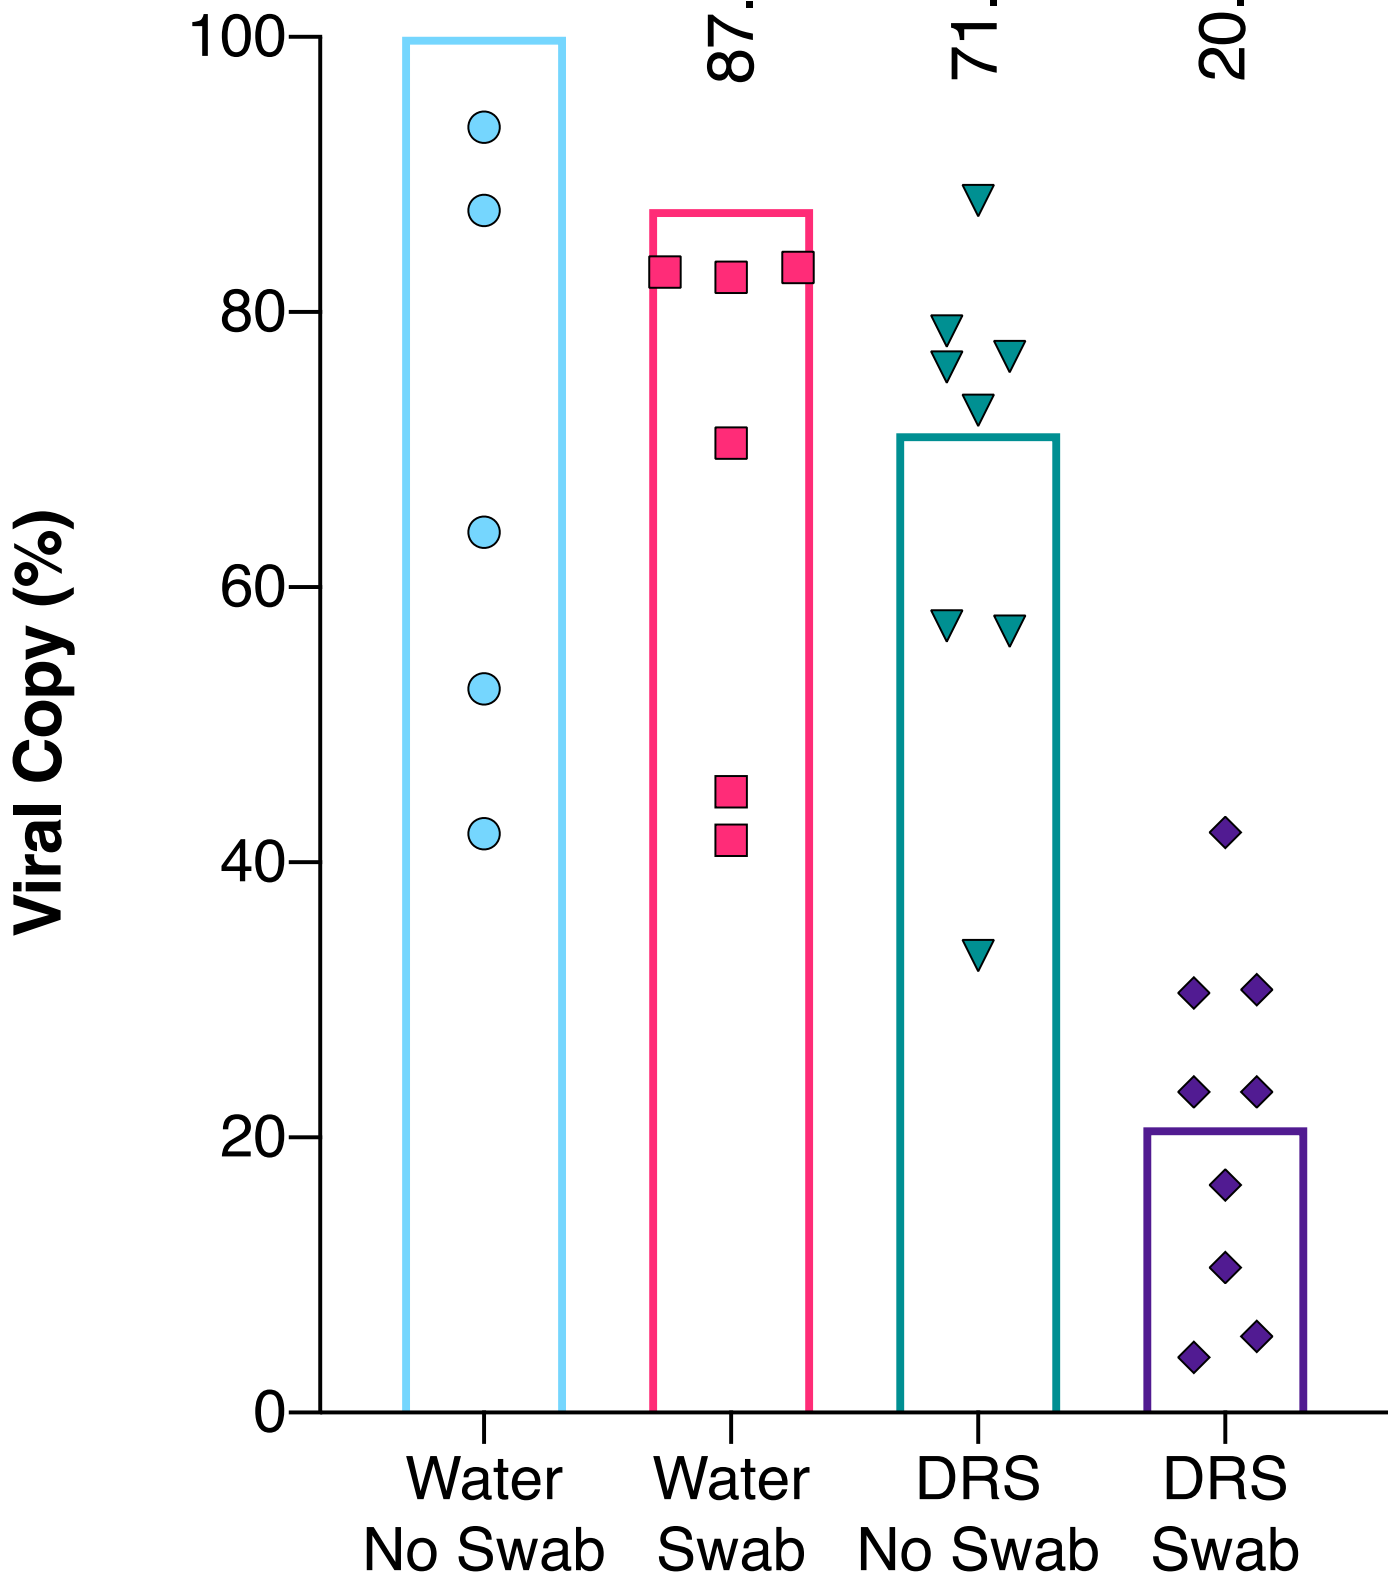

**Viral Copies per 5 $\mu$ L of RNA Extract**

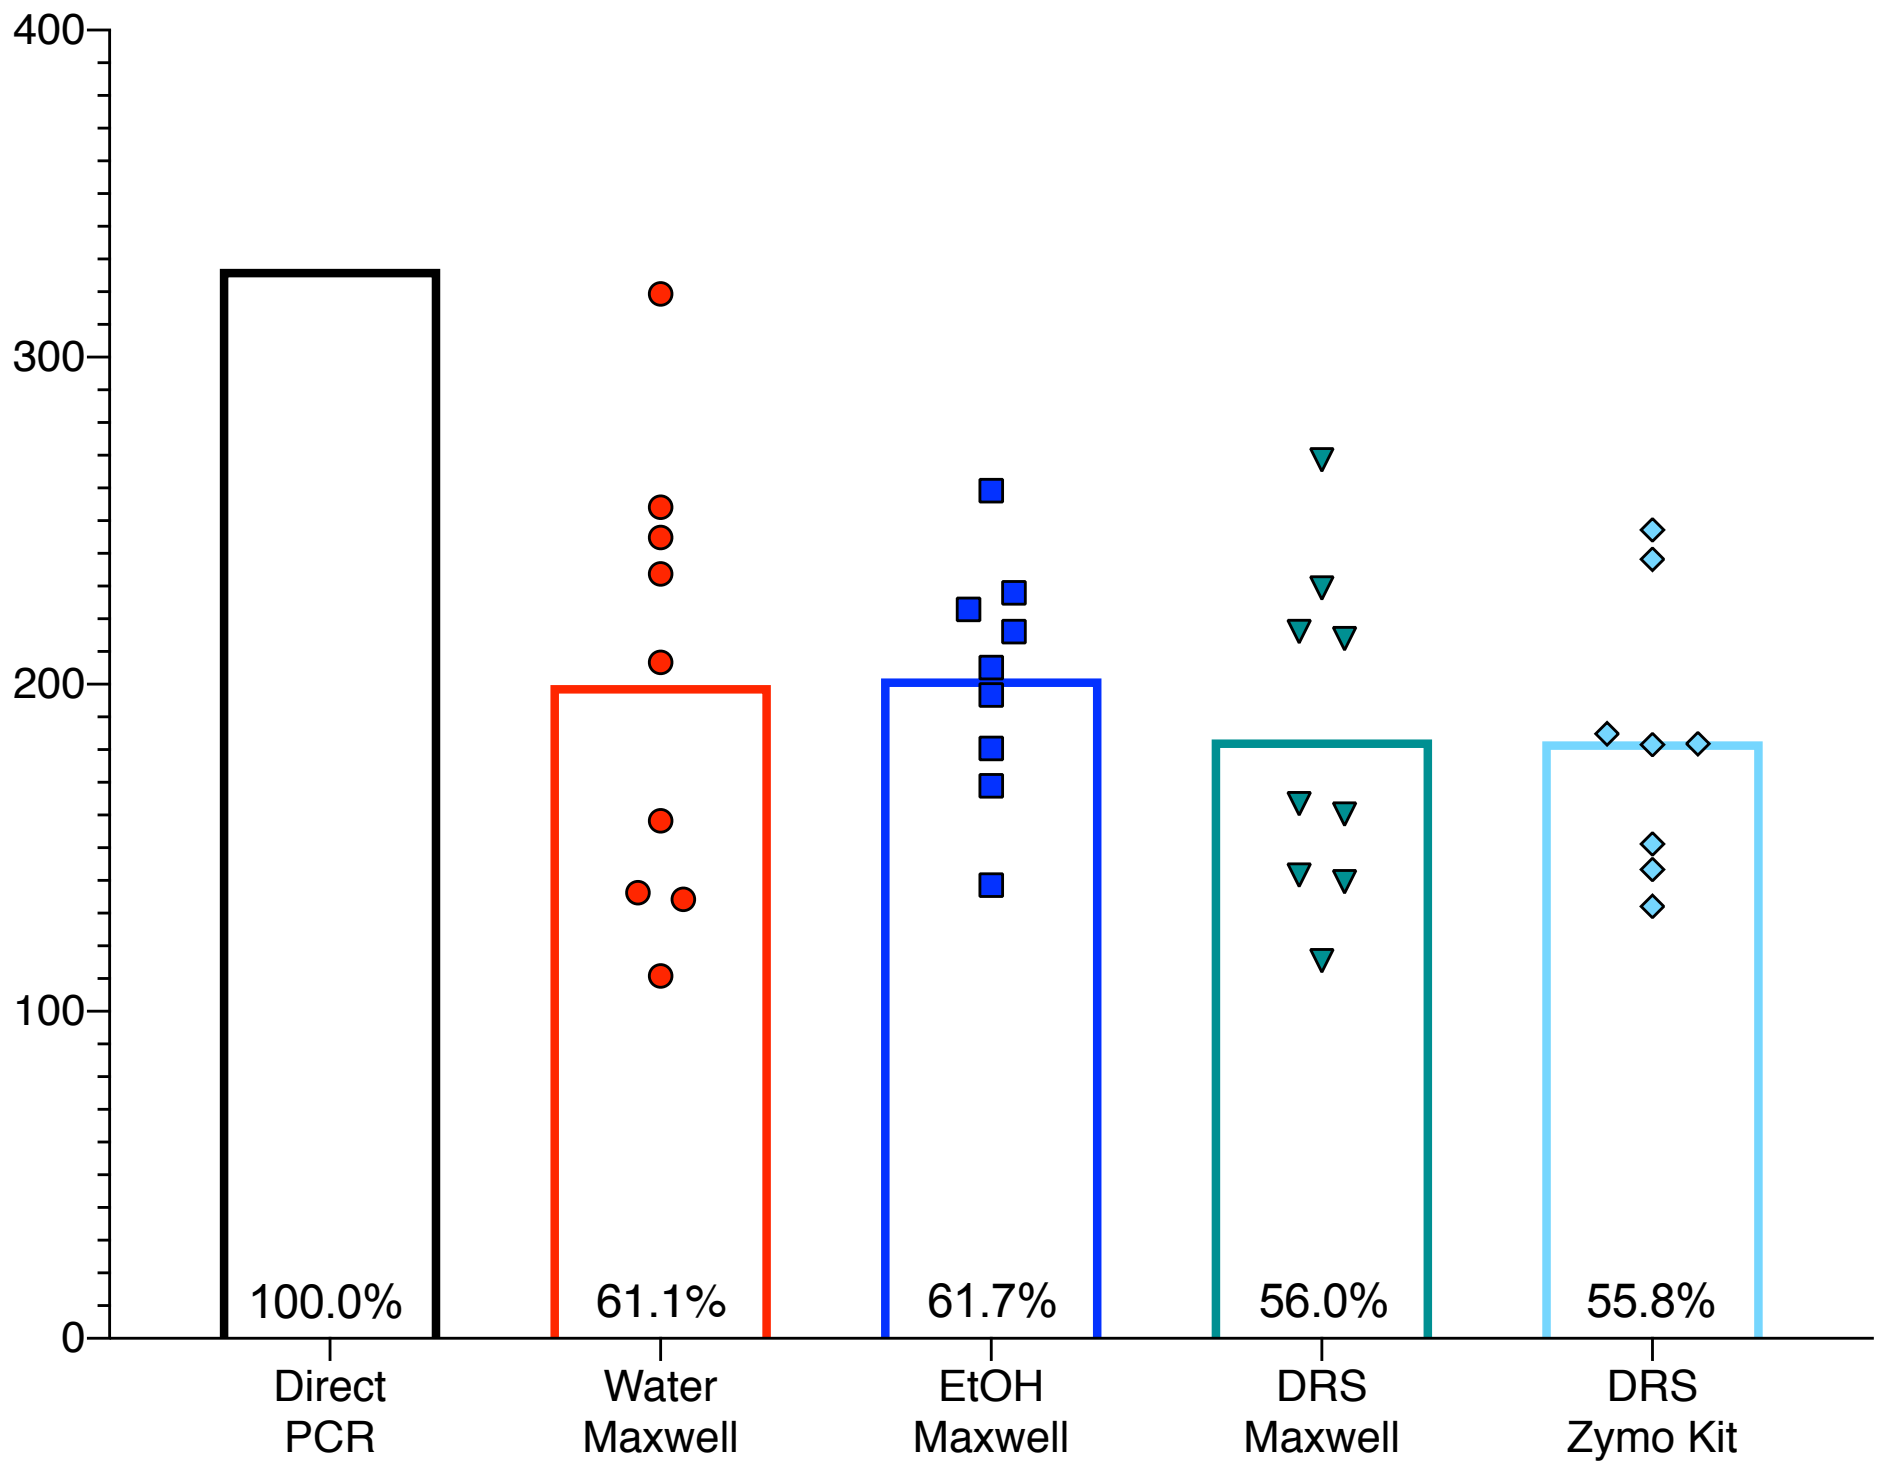

A

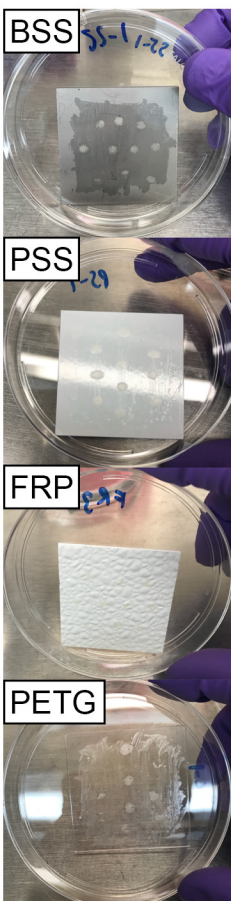

B

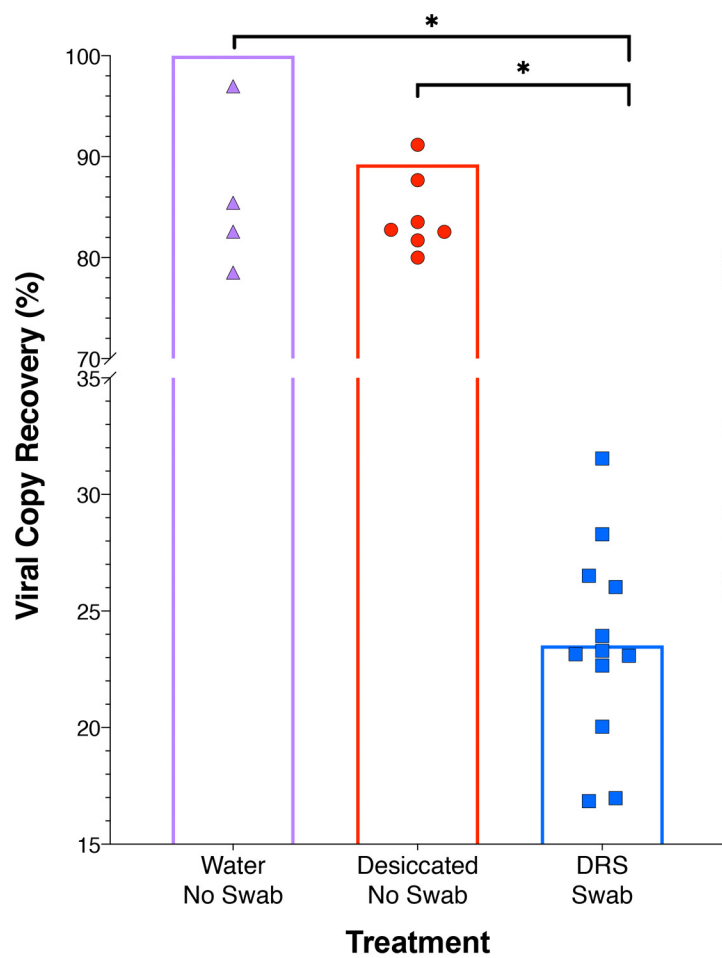

C

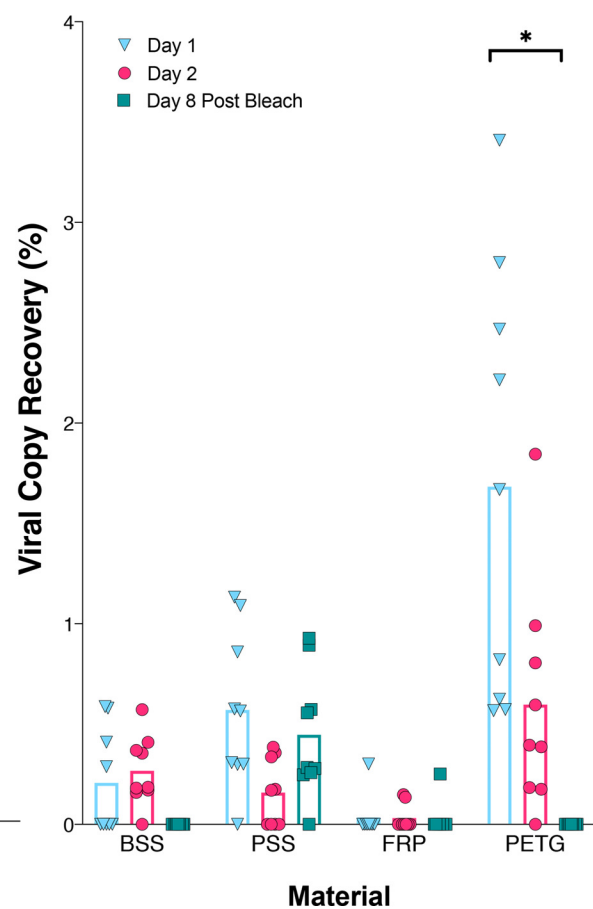

A

| Sample Name | Viral Practice Number |       |         |       |          |       |          |       |          |       |          |       |
|-------------|-----------------------|-------|---------|-------|----------|-------|----------|-------|----------|-------|----------|-------|
|             | 0                     |       | 2.5     |       | 5        |       | 10       |       | 12.5     |       | 25       |       |
|             | LAMP                  | Qubit | LAMP    | Qubit | LAMP     | Qubit | LAMP     | Qubit | LAMP     | Qubit | LAMP     | Qubit |
| AccuPlex    | -                     | -     | 17ng/μL | +     | 161ng/μL | +     | 240ng/μL | NA    |          | NA    |          |       |
| NATrol A    | -                     | -     | 7ng/μL  | -     | 7ng/μL   | NA    |          | +     | 280ng/μL | +     | 282ng/μL |       |
| NATrol B    | -                     | -     | 7ng/μL  | -     | 6ng/μL   | NA    |          | +     | 224ng/μL | +     | 220ng/μL |       |

B

| Sample Name | qPCR Copy Number |      |      | LAMP Assay |  |  |     |
|-------------|------------------|------|------|------------|--|--|-----|
|             | 1                | 2    | 3    | Value      |  |  |     |
| BSS1        | BDL              | 5    | BDL  |            |  |  | --- |
| BSS2        | BDL              | BDL  | BDL  |            |  |  | +++ |
| BSS3        | 10               | 7    | 10   |            |  |  | +-- |
| PS1         | 14               | 19   | 18   |            |  |  | -++ |
| PS2         | BDL              | 5    | 5    |            |  |  | --- |
| PS3         | 5                | 9    | 9    |            |  |  | +-- |
| PETG1       | 10               | 9    | 9    |            |  |  | --- |
| PETG2       | 41               | 27   | 46   |            |  |  | +++ |
| PETG3       | 14               | 56   | 36   |            |  |  | --+ |
| FRP1        | BDL              | BDL  | BDL  |            |  |  | --- |
| FRP2        | BDL              | BDL  | BDL  |            |  |  | --- |
| FRP3        | BDL              | 5    | BDL  |            |  |  | --- |
| NC_BSS      | BDL              | BDL  | BDL  |            |  |  | --- |
| ZS1         | BDL              | BDL  | BDL  |            |  |  | --- |
| ZSZ1        | 394              | 384  | 437  |            |  |  | +++ |
| ZSZ2        | 279              | 330  | 373  |            |  |  | +++ |
| ZSZ3        | 466              | 380  | 519  |            |  |  | +++ |
| ZPC1        | 1852             | 1825 | 1541 |            |  |  | +++ |
| ZPC2        | 1730             | 1689 | 1673 |            |  |  | +++ |
| ZPC3        | 1608             | 1501 | 1399 |            |  |  | +++ |
| Blank       |                  |      |      |            |  |  | --- |
| Positive    |                  | NA   |      |            |  |  | +++ |
| Blank       |                  |      |      |            |  |  | --- |
| Negative    |                  | NA   |      |            |  |  | --- |

C

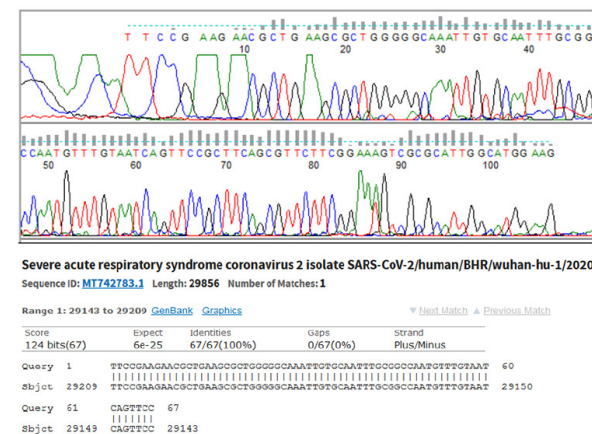

D

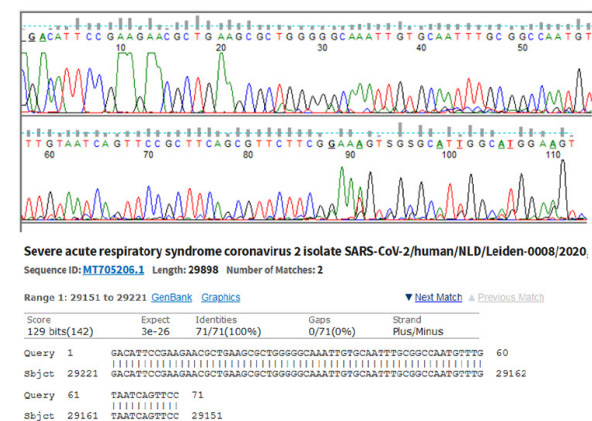

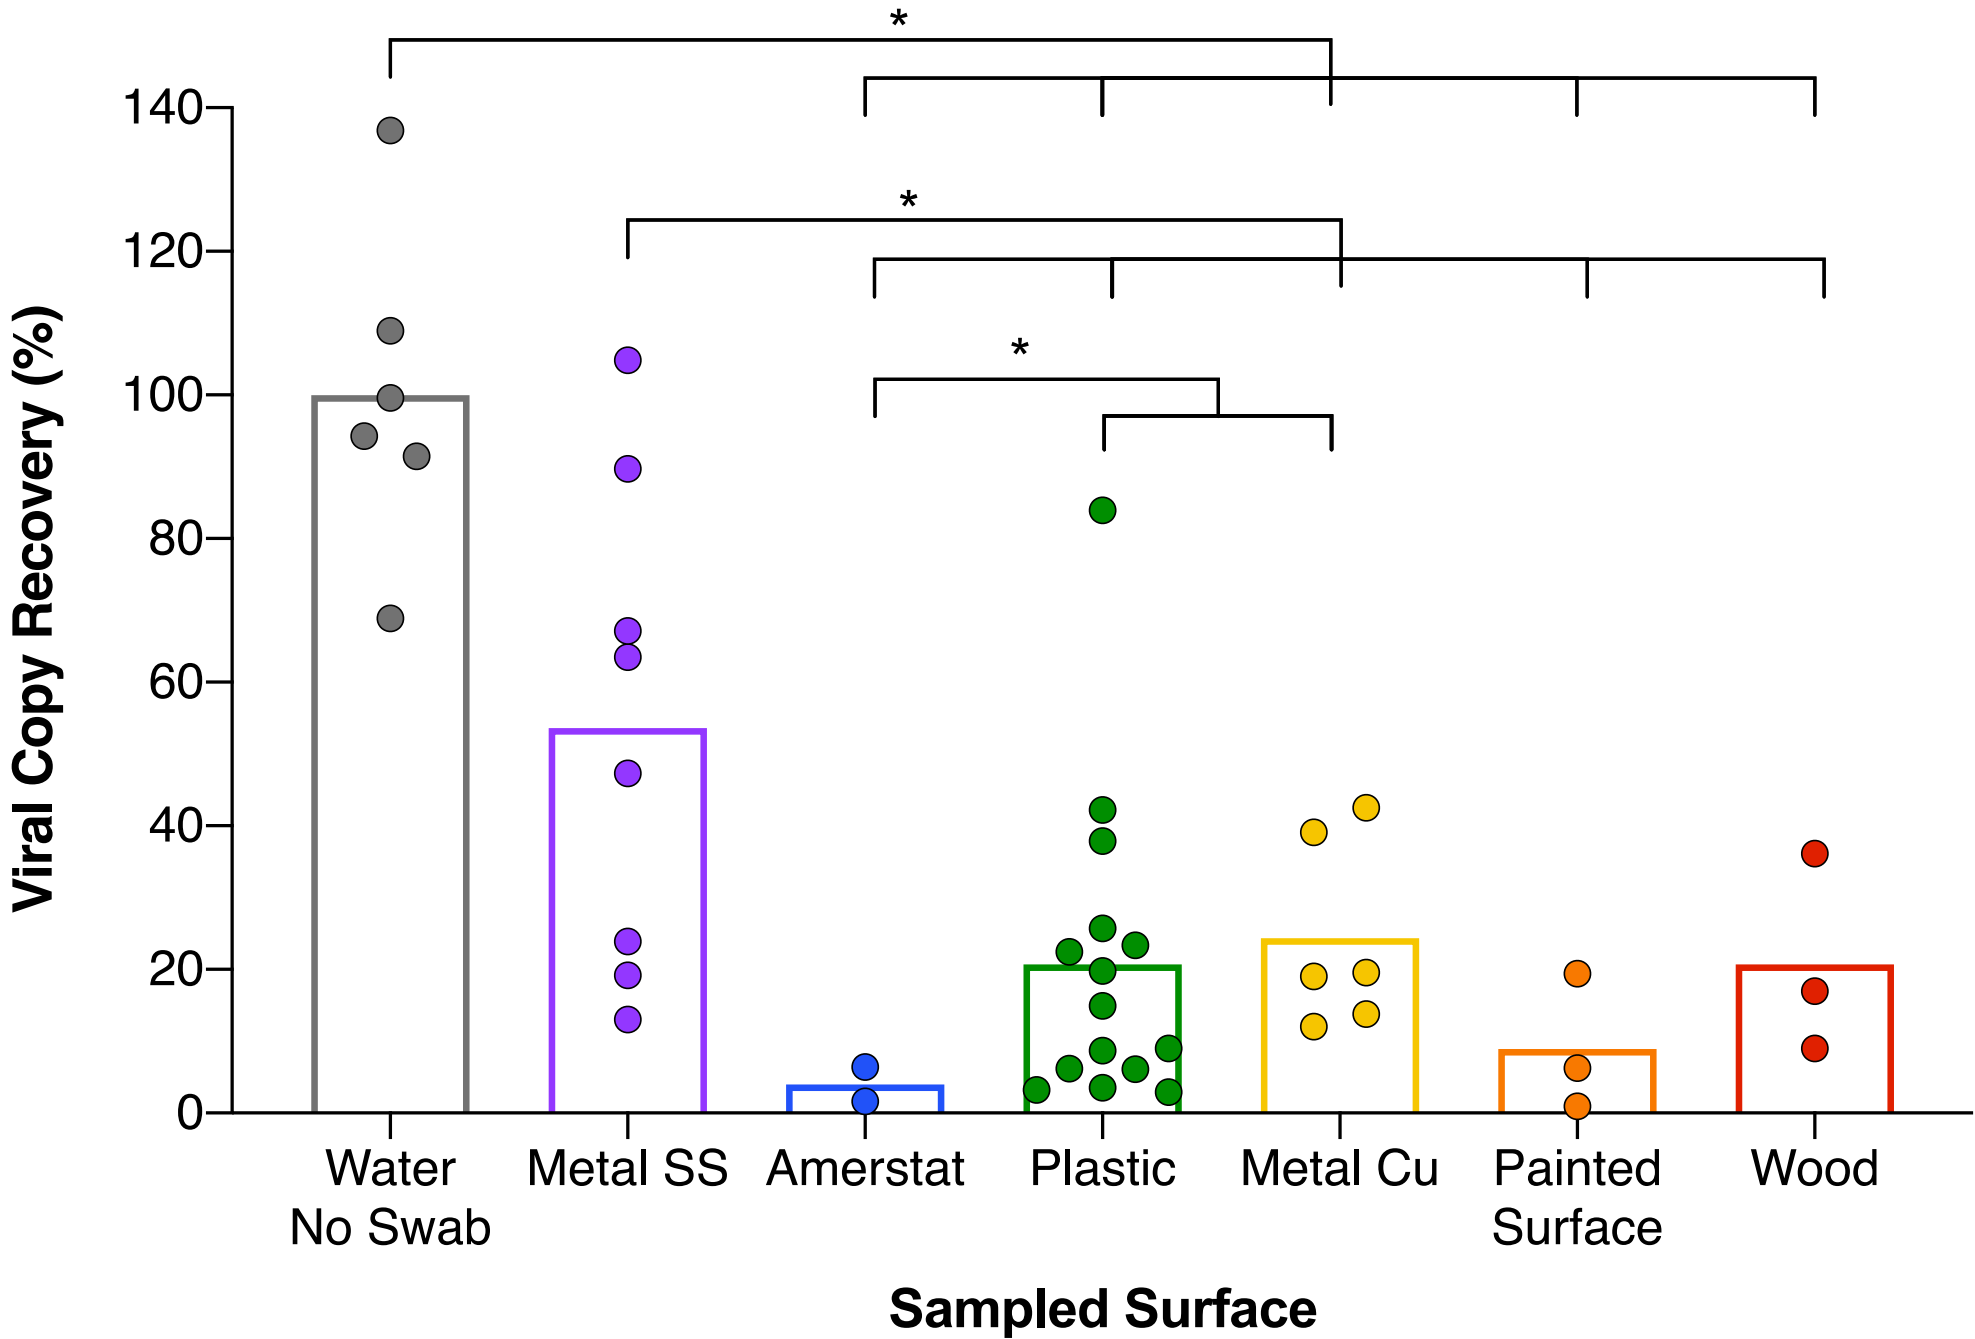

### 1 Surface sample collection

Collection of samples from work surfaces.

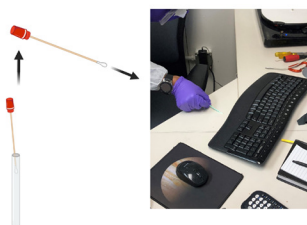

### 2 Viral transport medium

Specimen is stored in zymo shield at 2-8°C for up to 72 hours or proceed to RNA extraction.

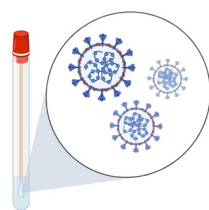

### 3 RNA extraction ~45 min

Purified RNA is extracted from deactivated virus.

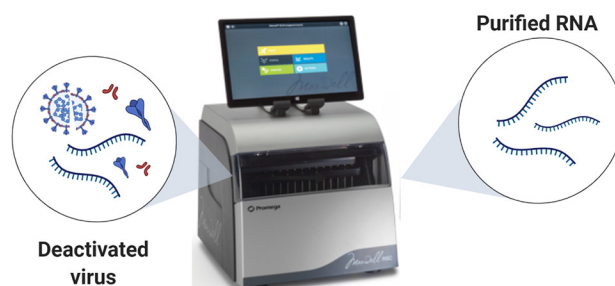

### 4 RT-qPCR assay ~90 min

Purified RNA is reverse transcribed to cDNA and amplified by qPCR.

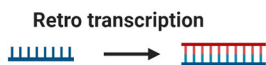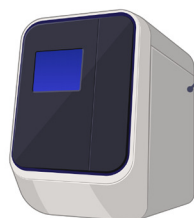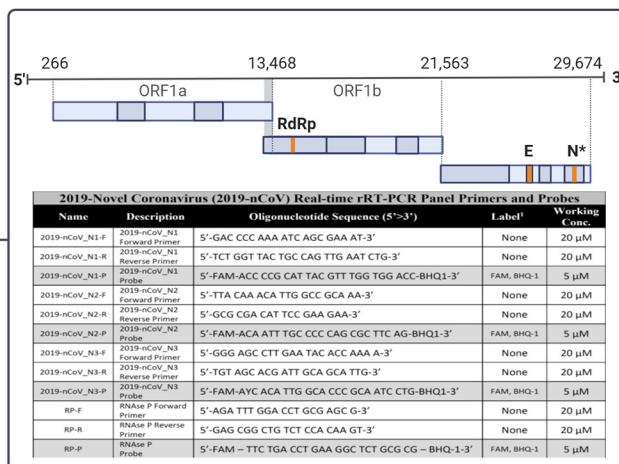

### 5 Test results real-time

Positive SARS-CoV2 sample cross the threshold line within 40 cycles (< 40 Ct values).

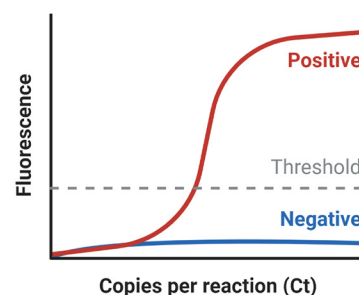

Source: https://medrxiv.org/content/10.1101/2020.08.16.20172668v1.full.pdf
